# Supplementary material for: Identification of Drought Tolerance Markers in a Diverse Population of Rice Cultivars by Expression and Metabolite Profiling
Source: PLOS journal article supplement (doi:10.1371/journal.pone.0063637), 2013-05-22

P1 DUF647 domain containing protein, put

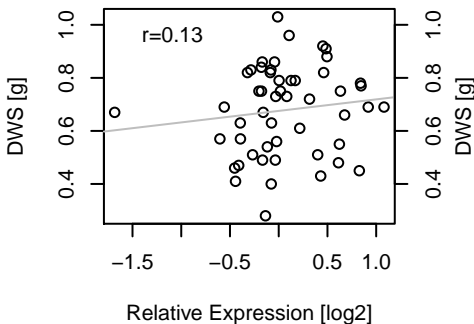

P5 KH domain containing protein, putativ

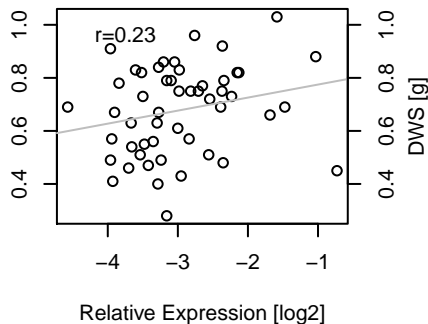

P9 Helix-loop-helix DNA-binding do

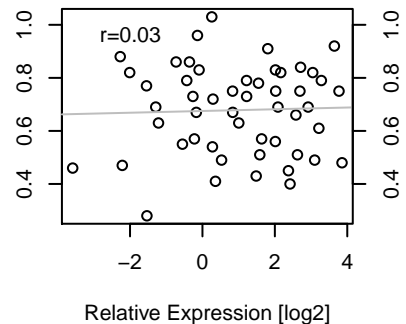

P2 Glycine-rich cell wall structural pro

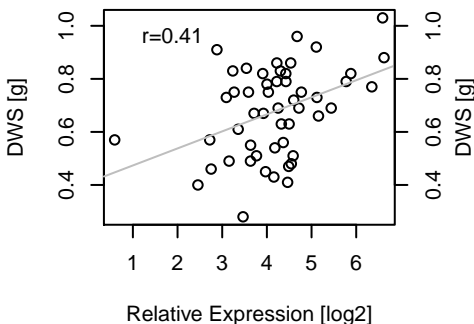

P6 Phosphatidic acid phosphatase-related

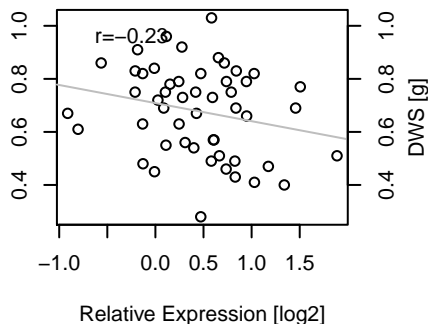

P10 tRNA synthetases class II doma

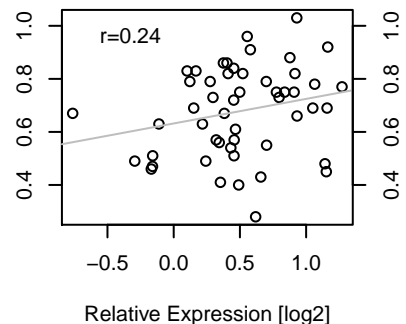

P3 Ribosome inactivating protein, putati

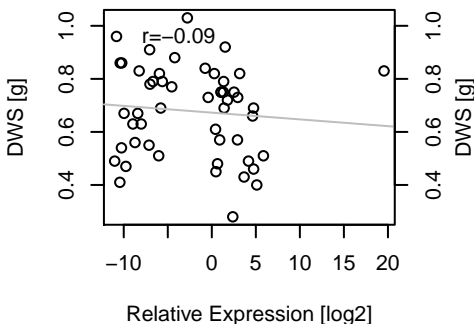

P8 Fructose-1,6-bisphosphatase, cytosoli

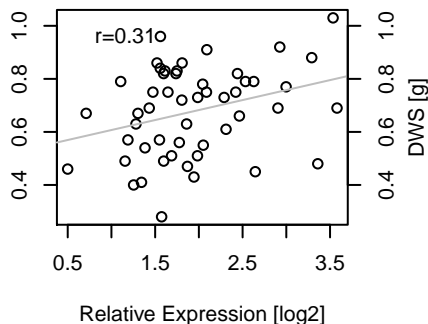

P11 CAMK\_KIN1/SNF1/Nim1\_like.1

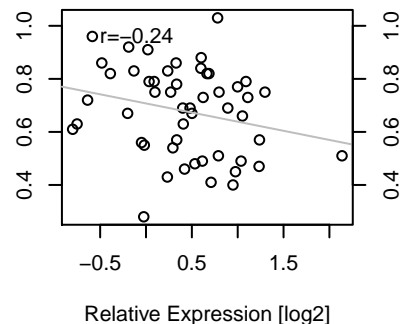

P12 Aconitate hydratase protein, putativ

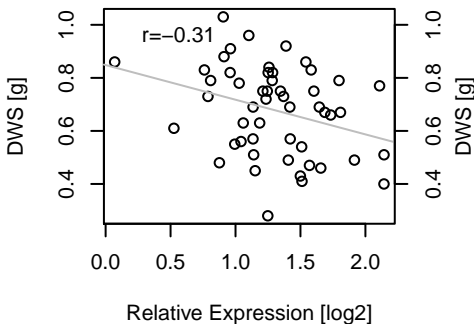

P15 Chorismate synthase 2, chloroplast p

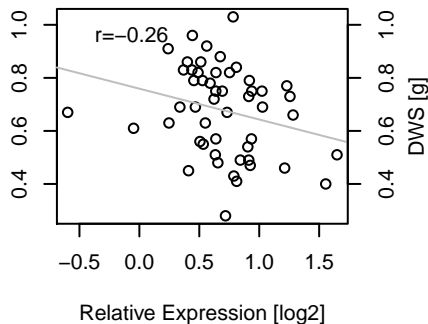

P18 S1 RNA binding domain contain

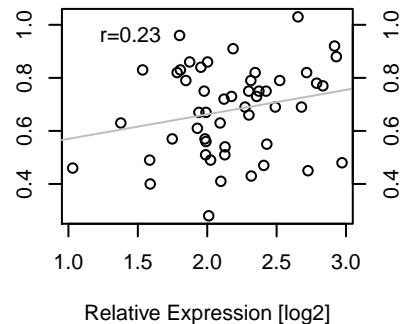

P13 Expressed protein

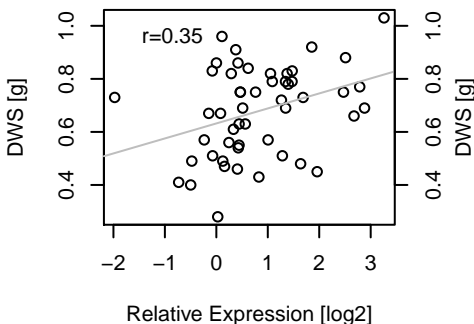

P16 Fructose-1,6-bisphosphatase, chlorop

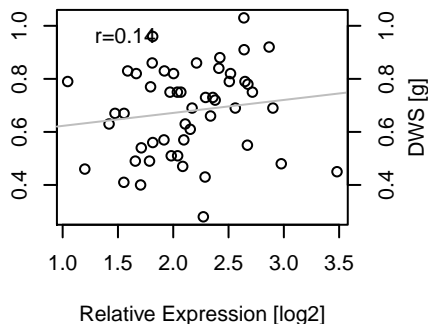

P19 Expressed protein

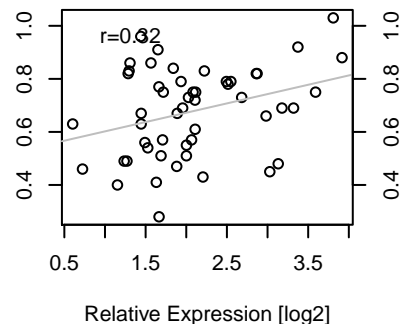

P14 Transporter family protein, putative

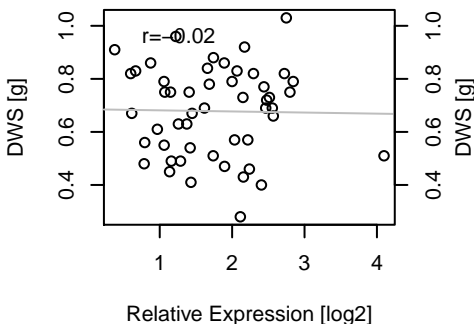

P17 Asparagine synthetase, putative

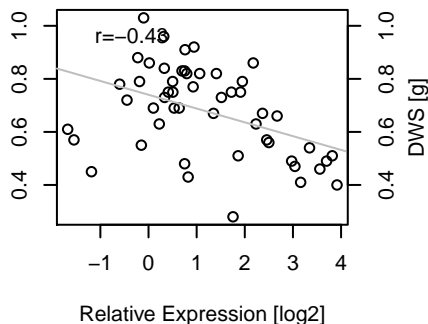

P20 Terpene synthase family, metal I

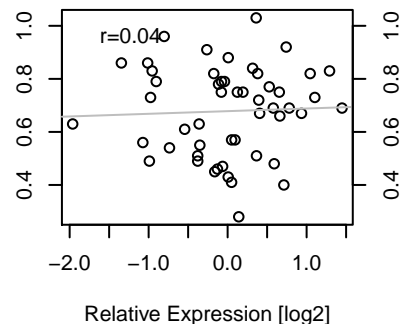

P21 MATE efflux family protein, putative

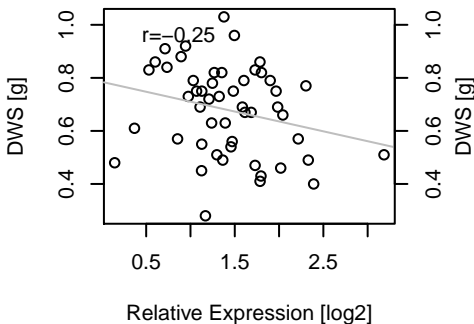

P24 app1, putative

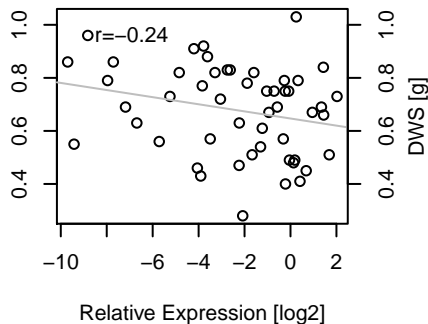

P27 50S ribosomal protein L17, puta

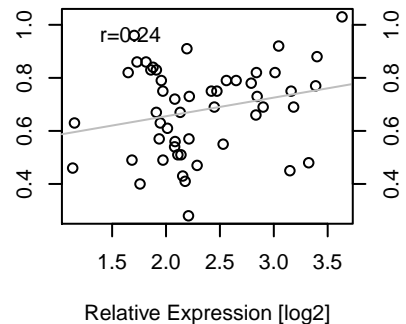

P22 PPR repeat containing protein

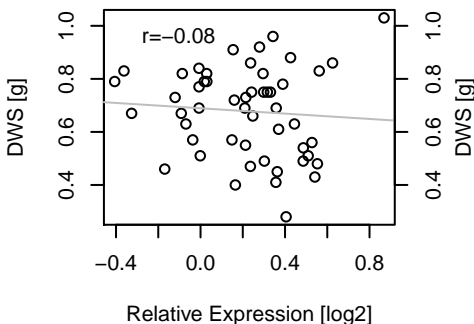

P25 Gibberellin receptor GID1L2, putativ

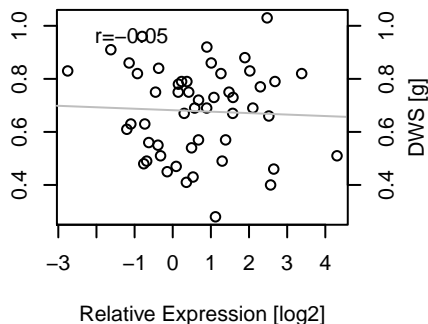

P28 Ribosomal protein S6, putative

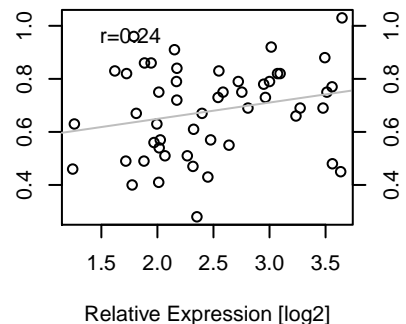

P23 Expressed protein

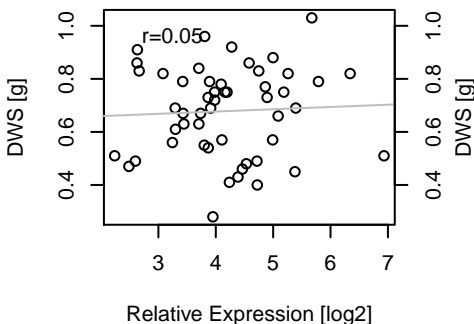

P26 C-5 cytosine-specific DNA methylase,

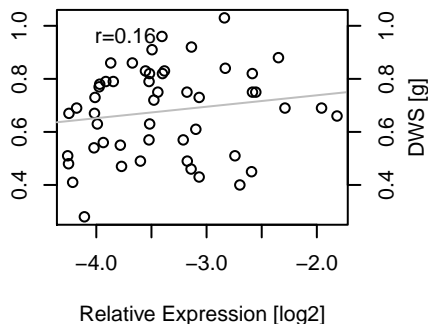

P29 Transmembrane amino acid tran

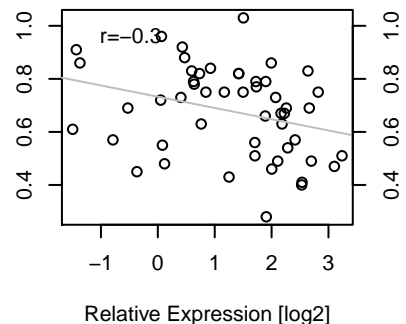

P30 AP2 domain containing protein

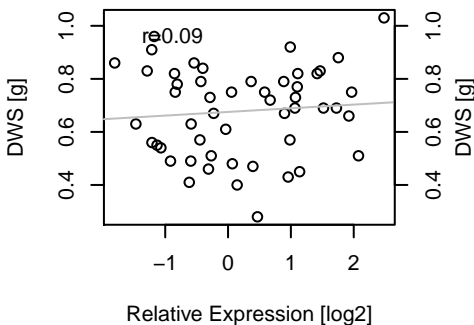

P34 Transposon protein, putative, unclas

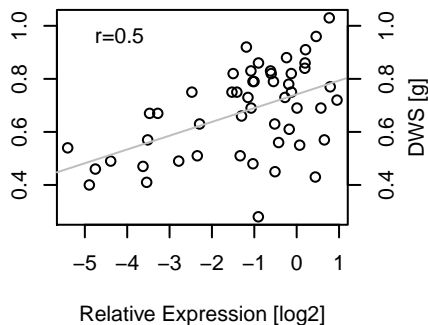

P38 Late embryogenesis abundant p

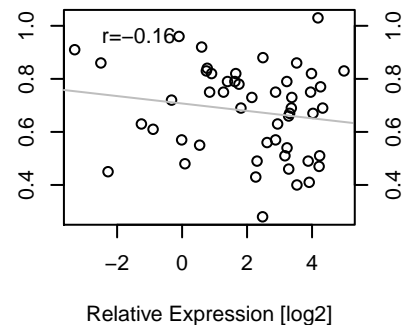

P31 Hydroxyacid oxidase 1, putative

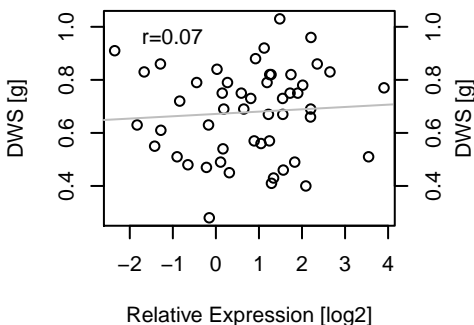

P35 Amine oxidase, flavin-containing, do

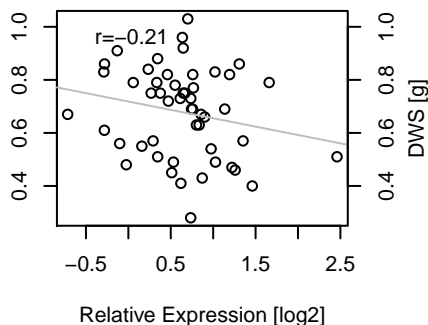

P39 OsSCP32 – Putative Serine Car

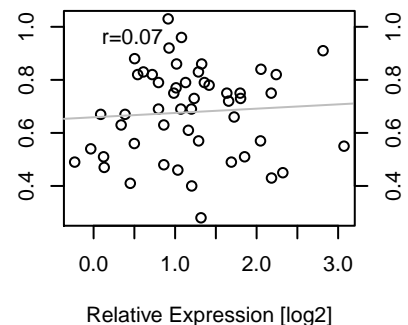

P32 Expressed protein

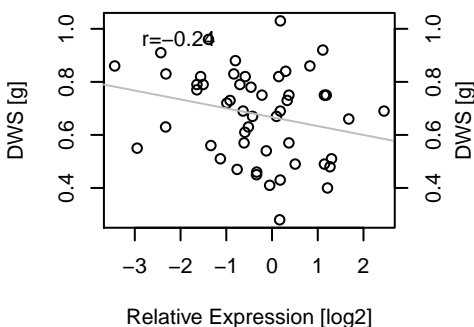

P37 Phosphatidylethanolamine-binding pro

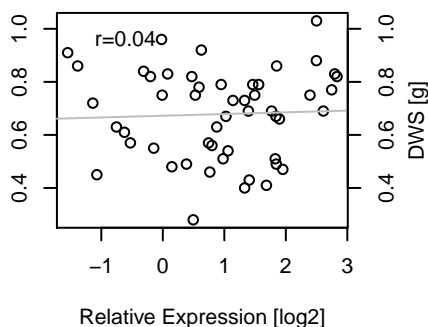

P40 Protein phosphatase 2C, putativ

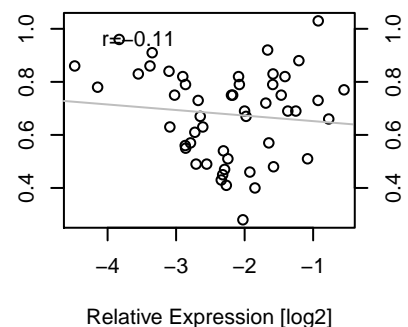

P41 Expressed protein

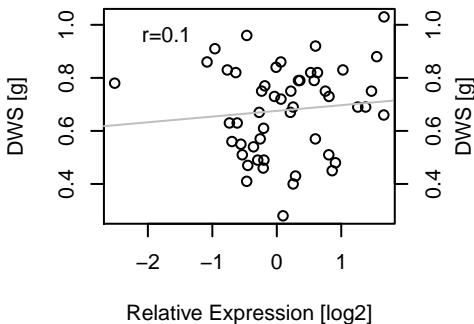

P44 Metal transporter Nramp6, putative

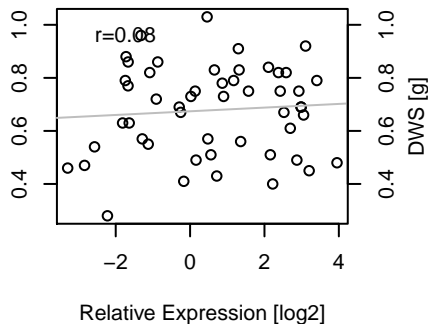

P48 Peroxidase precursor, putative

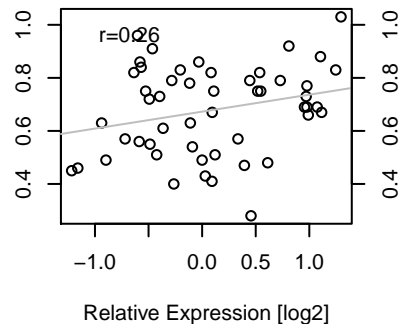

P42 Retrotransposon protein, putative, u

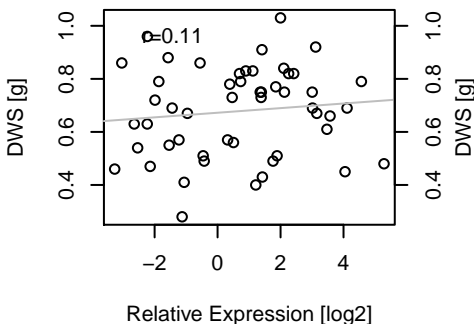

P46 WD40-like Beta Propeller Repeat fami

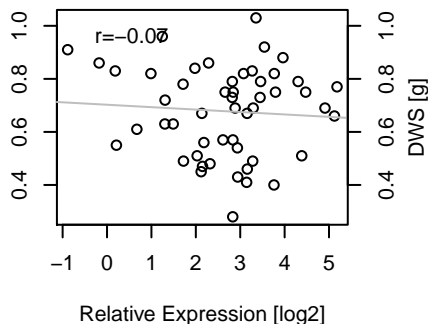

P49 AMP deaminase, putative

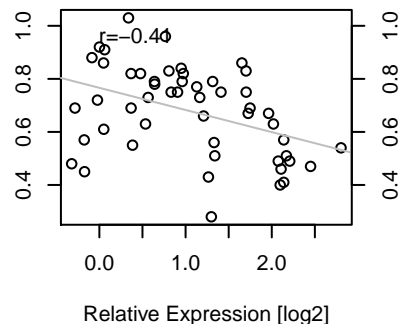

P43 Thioredoxin, putative

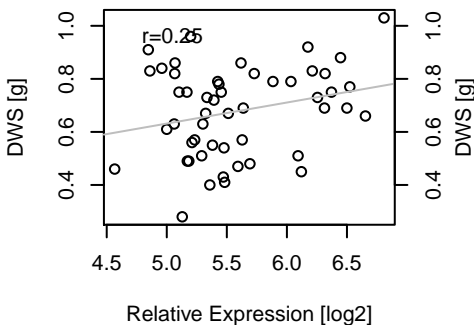

P47 Expressed protein

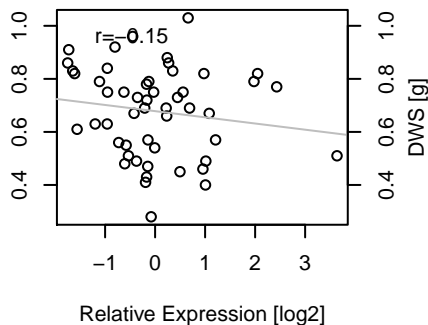

P50 AT hook motif domain containing

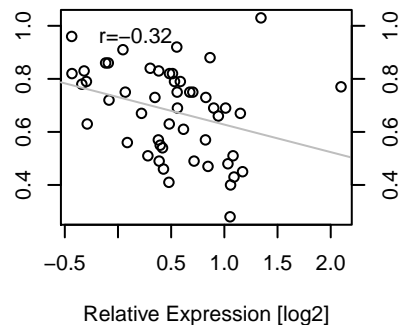

P53 MYB family transcription factor, put

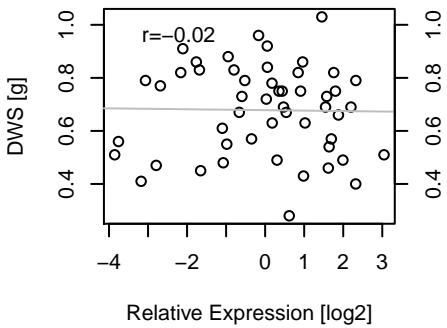

Supplement: S1 (10.1371/journal.pone.0063637.s001) [file journal.pone.0063637.s001]
