# Supplementary material for: Identification of Drought Tolerance Markers in a Diverse Population of Rice Cultivars by Expression and Metabolite Profiling
Source: PLOS journal article supplement (doi:10.1371/journal.pone.0063637), 2013-05-22

M1 Hydroxylamine

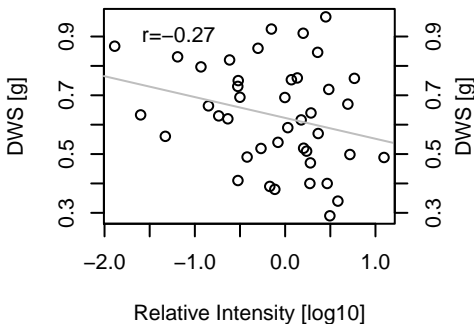

M4 Ethanolamine

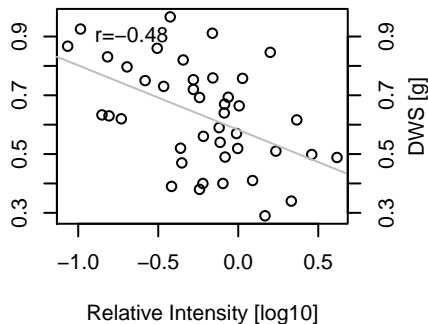

M7 Succinic acid

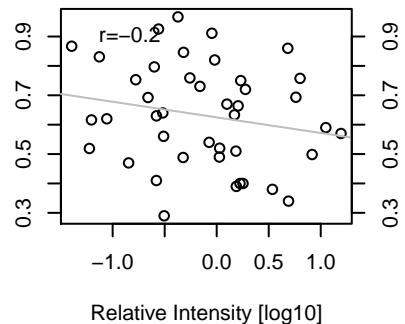

M2 Monomethylphosphate

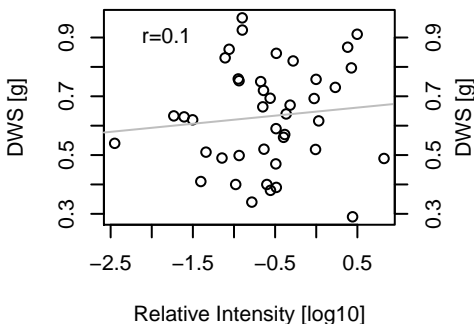

M5 Phosphoric acid

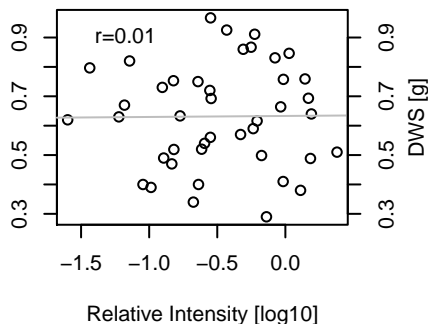

M8 Glyceric acid

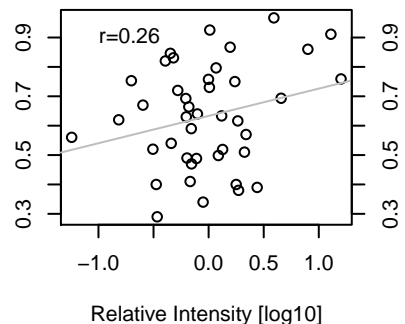

M3 Diethyleneglycol

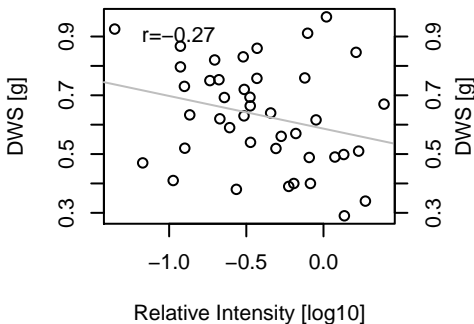

M6 Glycine

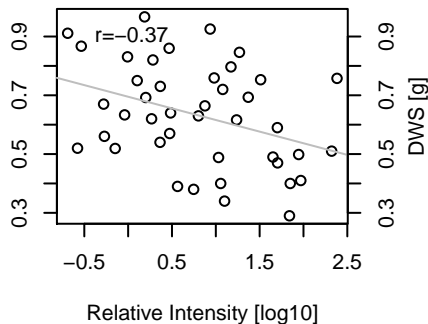

M9 Uracil

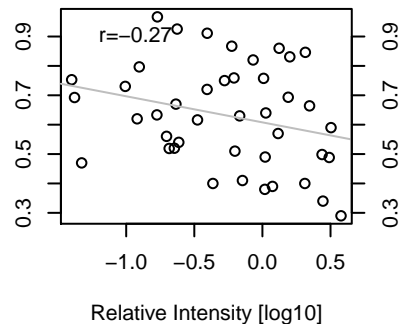

M10 Fumaric acid

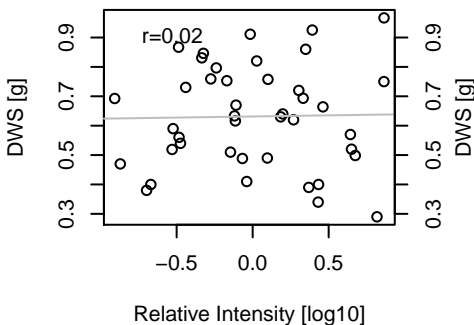

M13 Threonine

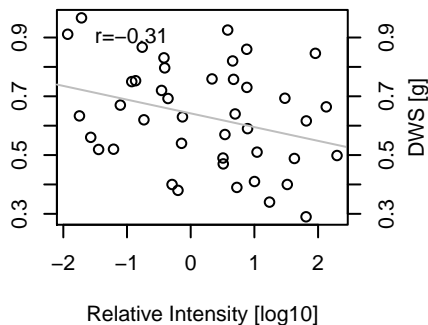

M16 2-Methylmalic acid

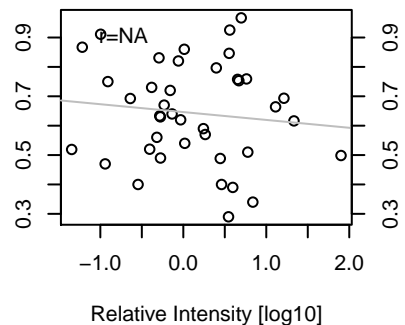

M11 Serine

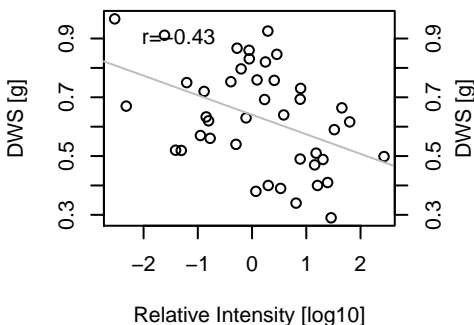

M14 MST 1419.8

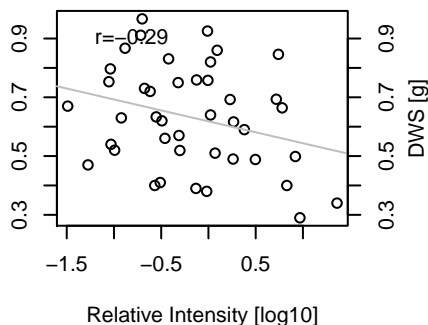

M17 Malic acid

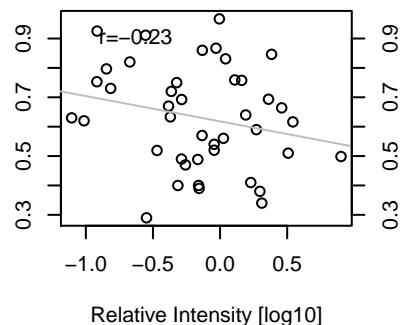

M12 Threonic acid-1,4-lactone

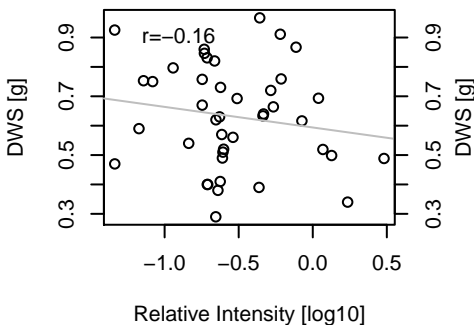

M15 Erythronic acid-1,4-lactone

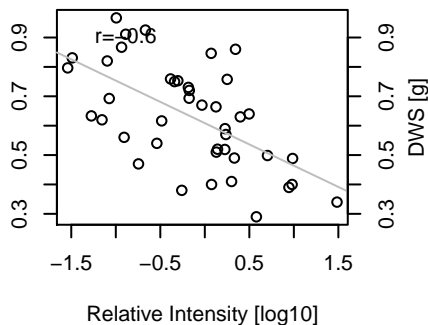

M18 Erythritol

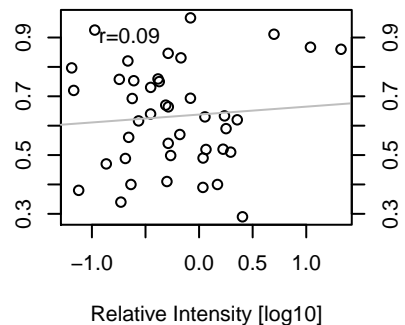

M19 Aspartic acid

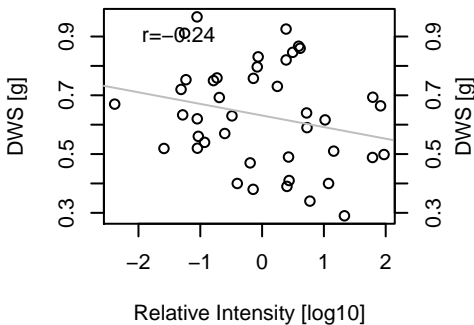

M22 Erythronic acid

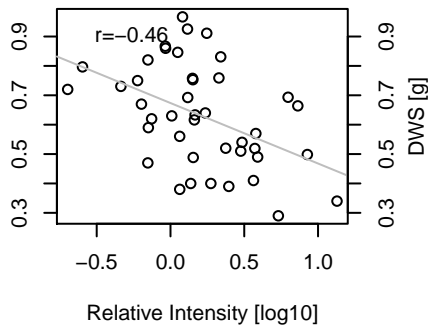

M25 2-Oxo-glutaric acid

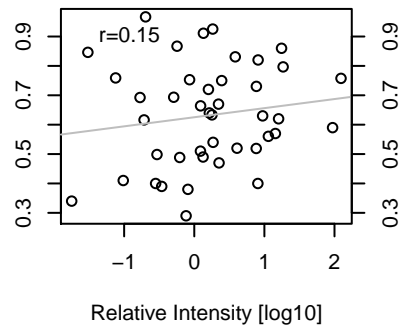

M20 Pyrroglutamic acid (Glutamine, Glutam

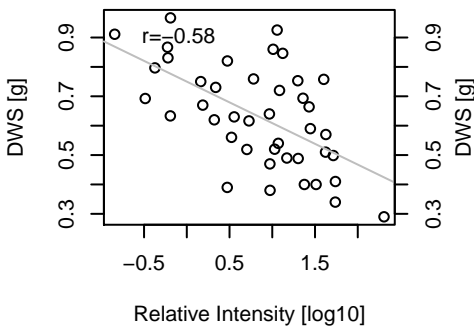

M23 Threonic acid

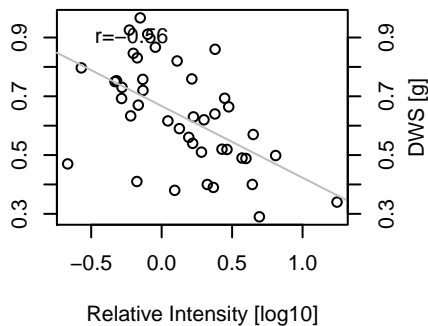

M26 MST 1574.3

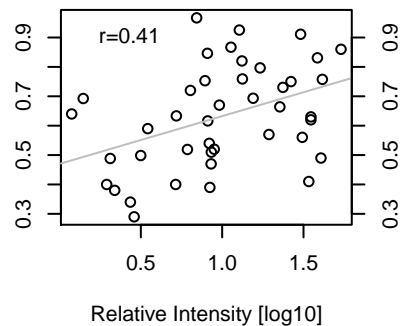

M21 Glutamic acid

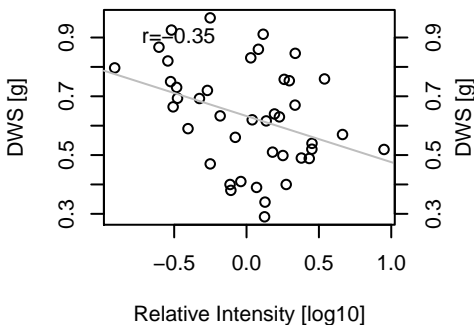

M24 Phenylalanine

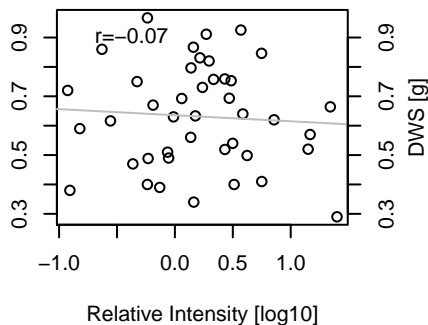

M27 Glutamic acid

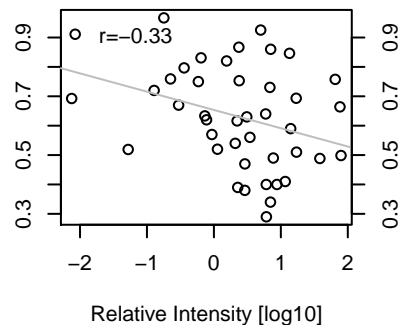

M28 Xylose

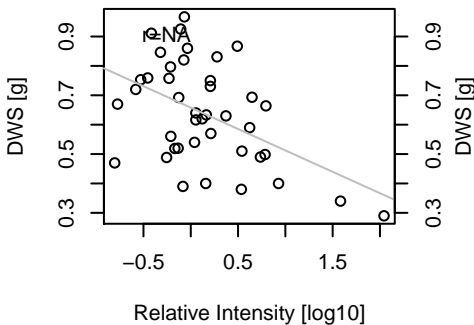

M31 MST 1691.2

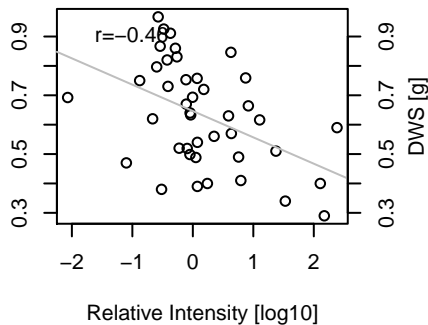

M34 MST 1730.77

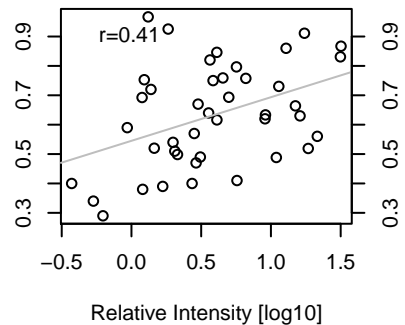

M29 Asparagine

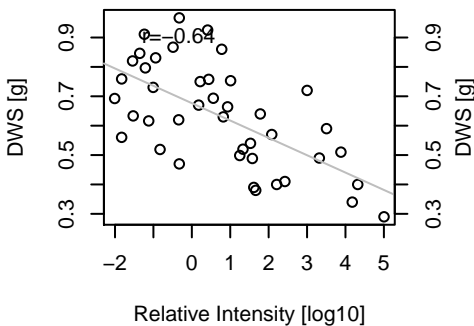

M32 1,6-Anhydro-beta-D-glucose

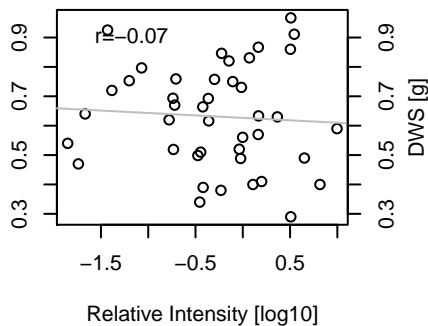

M35 MST 1732.9

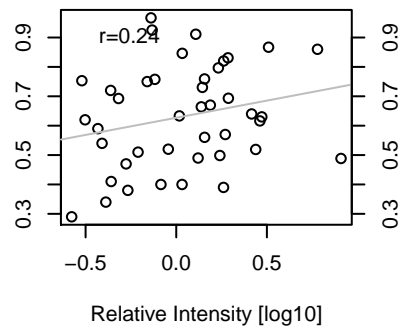

M30 Alcohol (Polyol, Pentahydroxy-)

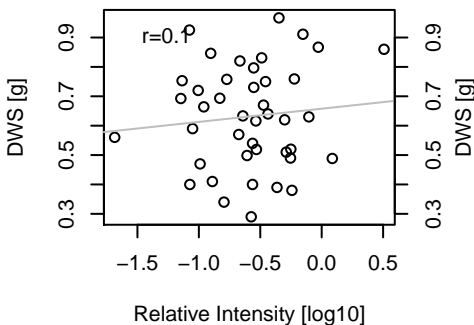

M33 Ribitol

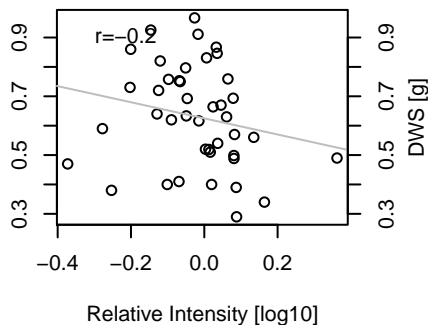

M36 Putrescine

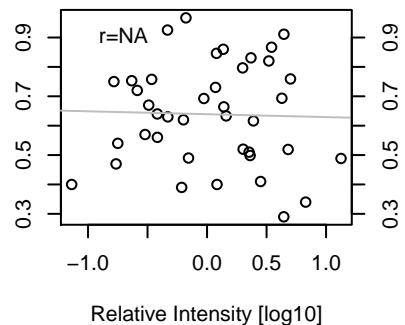

M37 Ribonic acid

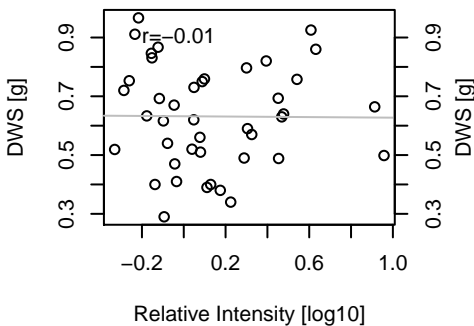

M40 Glutamine

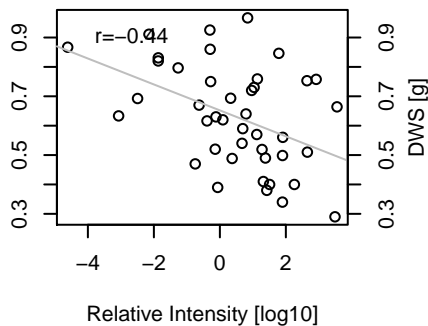

M43 Citric acid

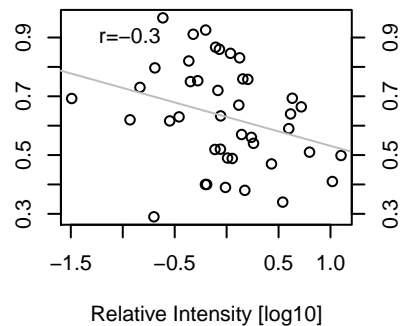

M38 Glycerol-3-phosphate

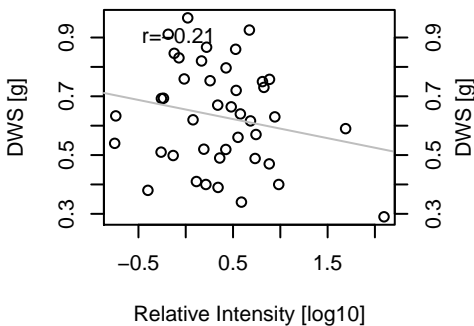

M41 Glyceric acid-3-phosphate

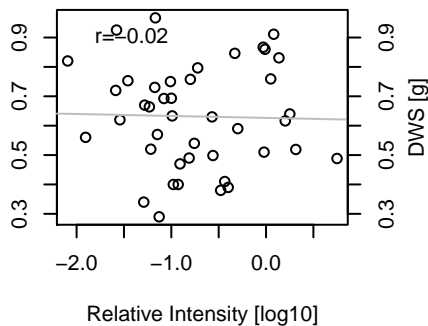

M44 MST 1816.2

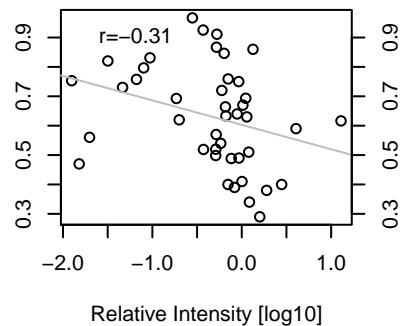

M39 MST 1756.27

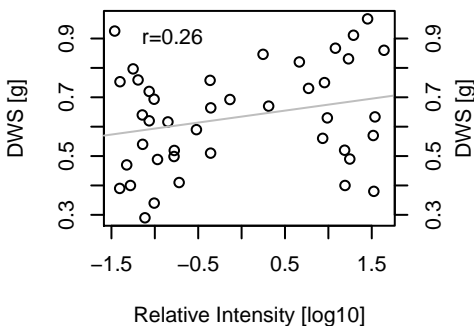

M42 Shikimic acid

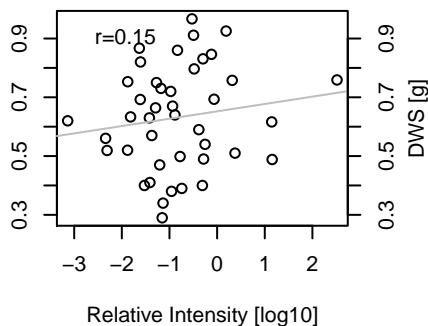

M45 Quinic acid

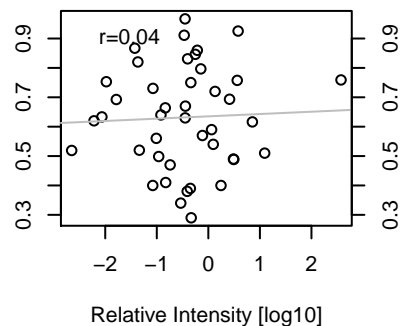

M46 Fructose

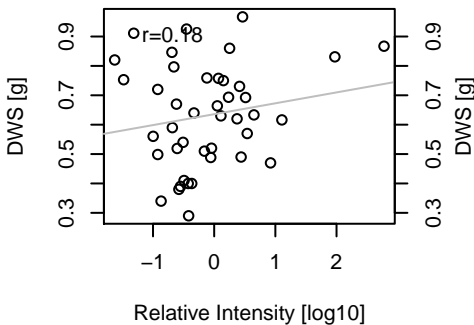

M49 Glucose

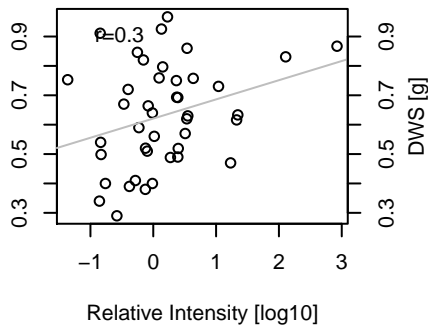

M52 Galactonic acid

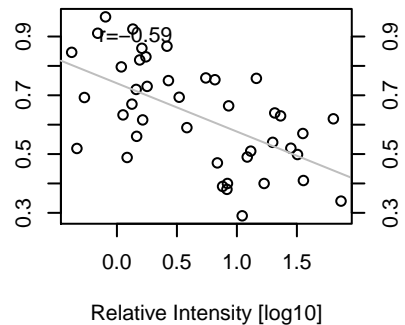

M47 Sorbose

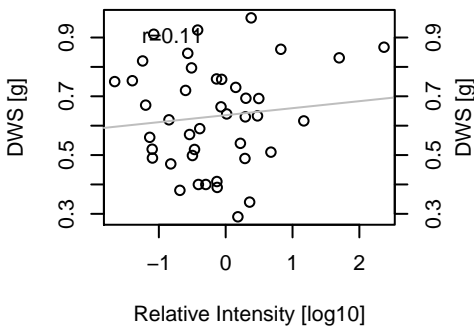

M50 Gluconic acid-1,4-lactone

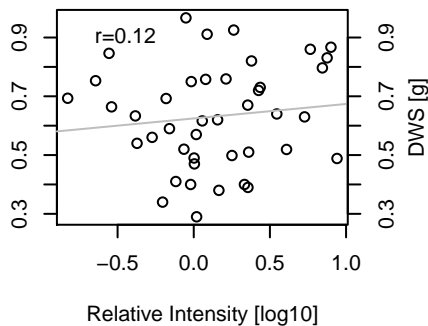

M53 Gluconic acid

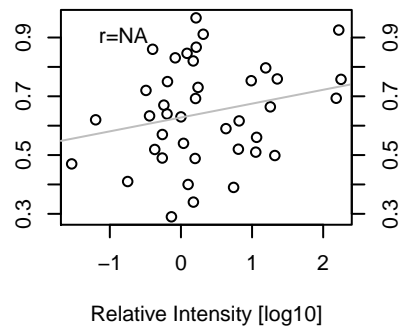

M48 Allantoin

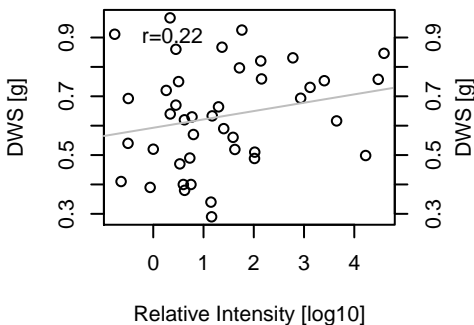

M51 Tyrosine

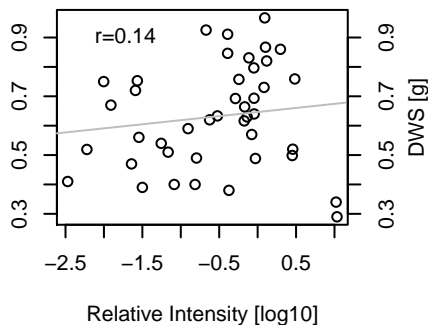

M54 MST 2002.33

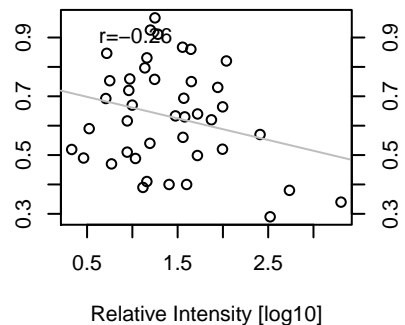

M55 Saccharic acid

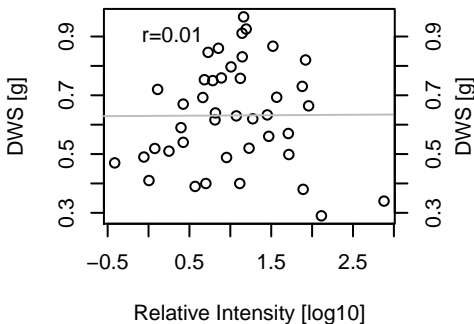

M58 MST 2125.87

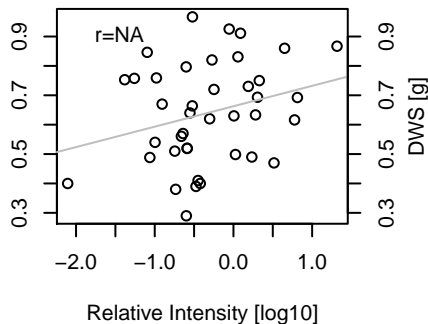

M61 MST 2276.64

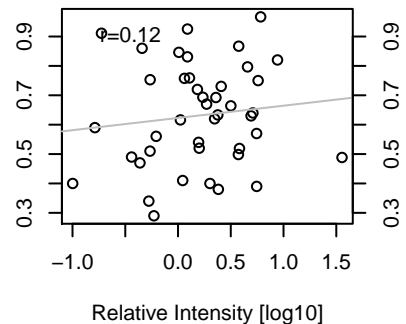

M56 Galactaric acid

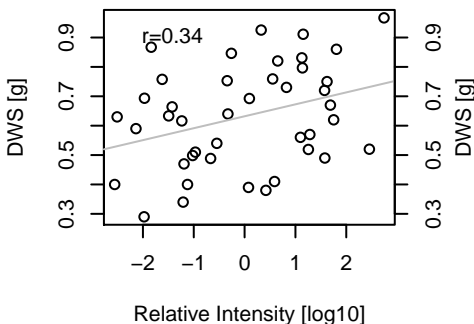

M59 MST 2160.33

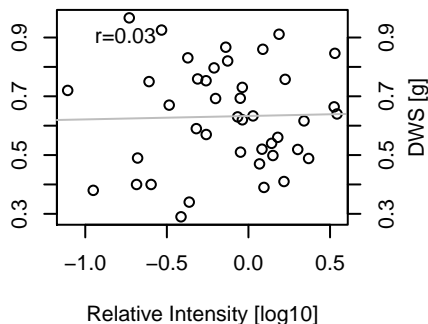

M62 Fructose-6-phosphate

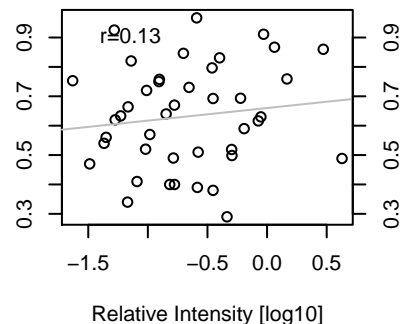

M57 myo-Inositol

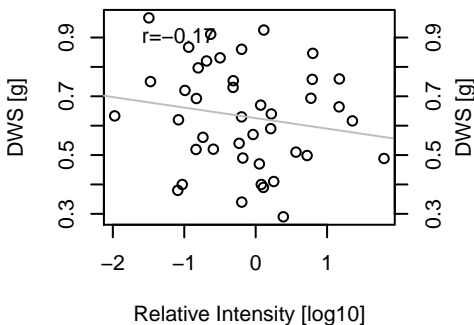

M60 Octadecanoic acid

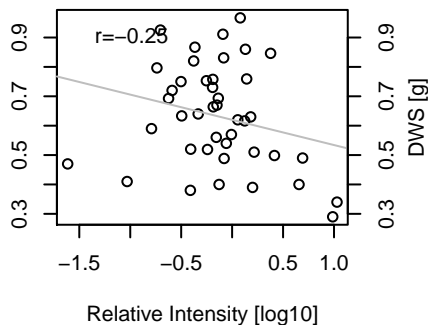

M63 Galactosylglycerol

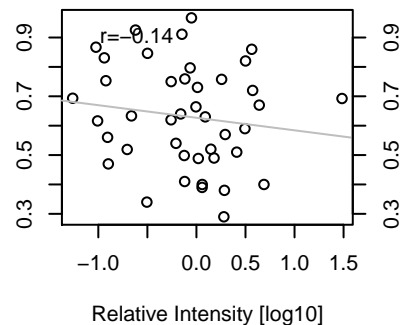

M64 Glucose-6-phosphate

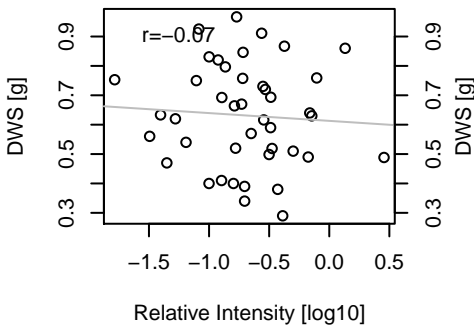

M67 Sugar Phosphate

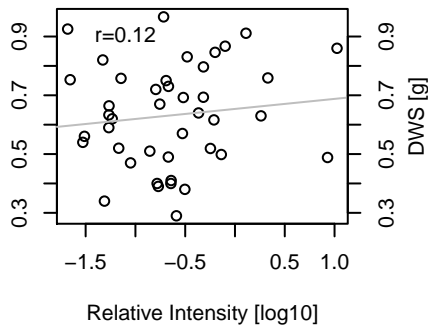

M70 Sucrose

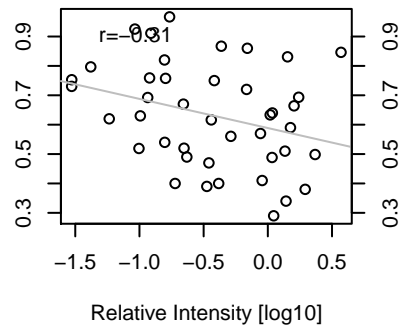

M65 MST 2360.1

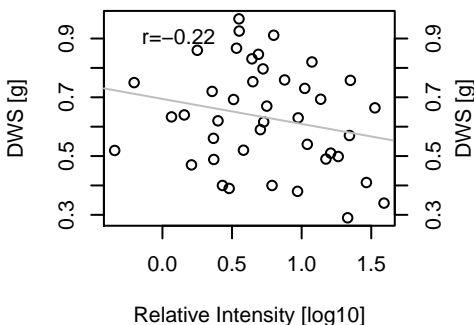

M68 Salicylic acid-glucopyranoside

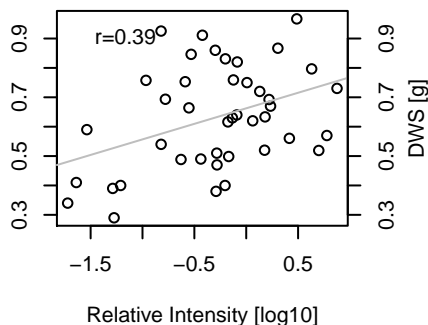

M71 MST 2656.76

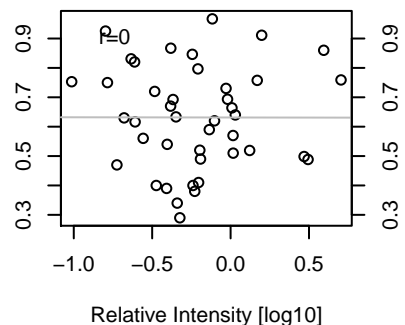

M66 MST 2482.9

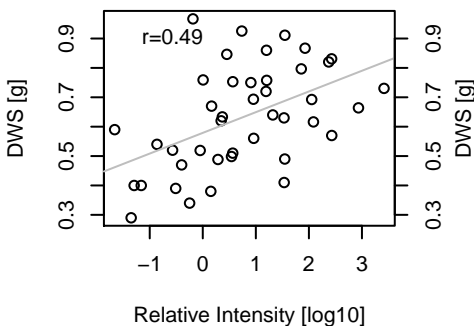

M69 MST 2578.73

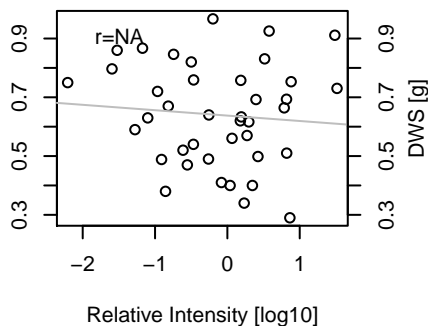

M72 Lactose

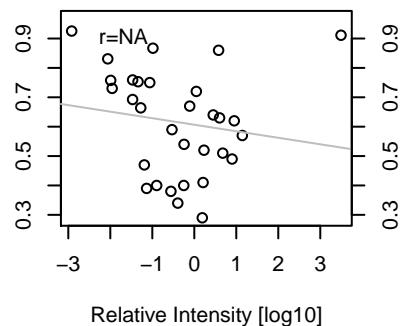



M73 Trehalose

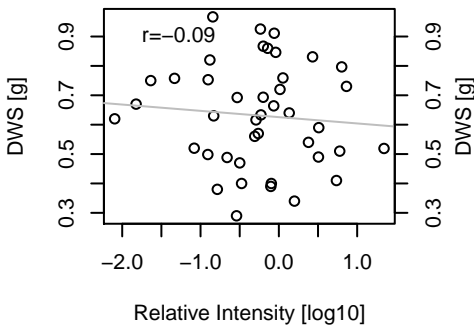

M76 MST 2913.73

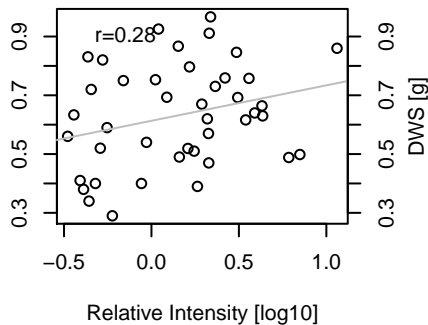

M79 Raffinose

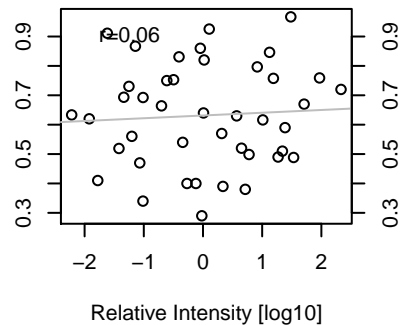

M74 MST 2866.46

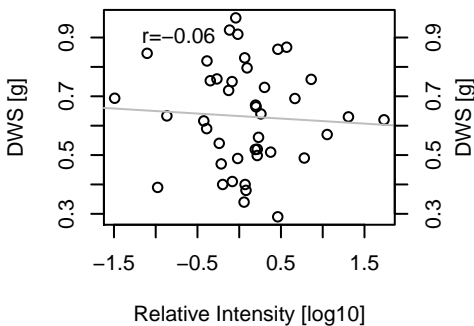

M77 Galactinol

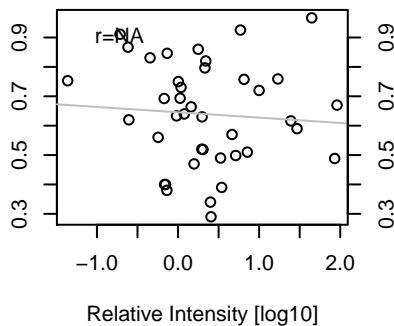

M75 Conjugate (Glycosyl, Inositol)

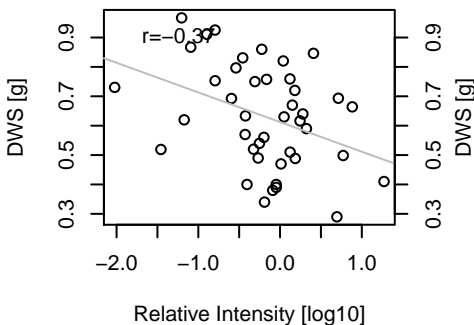

M78 MST 3092.87

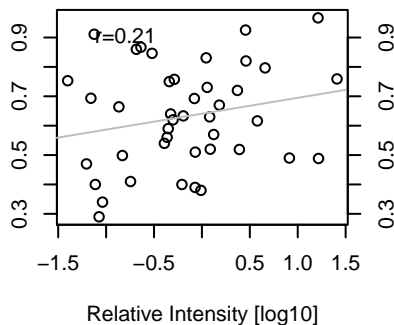

Supplement: S2 (10.1371/journal.pone.0063637.s002) [file journal.pone.0063637.s002]
