# Supplementary material for: Identification of Drought Tolerance Markers in a Diverse Population of Rice Cultivars by Expression and Metabolite Profiling
Source: PLoS One. 2013 May 22;8(5):e63637. doi: 10.1371/journal.pone.0063637 (PMC3661581; doi:10.1371/journal.pone.0063637)
Supplement: Table S2 — Mean normalised metabolite levels measured in rice cultivars under drought and control conditions. Cultivar identifiers see Table S1. Condition d = drought, c = control. Metabolite identifiers indicated in column heading see Table S3. NA = not detected. File Supplemental Table S3.xls, Format xls. (XLS) [file pone.0063637.s004.xls]

## Sheet: metabolites
Sample	Cultivar	Condition	Experiment	mean_Rank_day_18	mean_WUE	mean_Yield_day_18	mean_FWS	mean_DWS	mean_FWTotal	mean_DWTotal	M1	M2	M3	M4	M5	M6	M7	M8	M9	M10	M11	M12	M13	M14	M15	M16	M17	M18	M19	M20	M21	M22	M23	M24	M25	M26	M27	M28	M29	M30	M31	M32	M33	M34	M35	M36	M37	M38	M39
D1 1c	1	c	D1			0.68	19.0634	3.38258	31.5367	4.51631	-0.117748	-0.0552484	0.353288	0.460409	0.645833	0.347171	0.305826	-0.189785	0.056373	0.0437998	1.81623	0.621834	1.47435	1.15891	0.503708	0.308047	-0.0855859	0.567835	1.51918	0.87767	0.348501	0.349638	0.370397	0.521904	0.455636	-0.809032	0.905526	-0.495024	-0.688315	0.622574	-0.793314	1.16291	0.0262693	0.27749	0.152763	0.34603	0.423759	-0.145828	2.04802
D1 2c	2	c	D1			0.69825	16.0324	2.52706	29.3364	3.55489	0.192806	0.43809	0.505902	-0.0677986	0.856932	-0.141674	-0.68737	0.367025	1.47029	-0.0684591	0.292681	0.0508945	0.10762	-1.17724	0.911467	-0.397893	-0.0668367	0.201543	-0.139043	0.127509	0.0672455	-0.477792	-0.281802	-0.373091	-0.760468	-1.21261	-1.85694	NA	1.22537	0.474617	NA	0.814741	-0.117987	-0.548123	0.238864	-0.190649	-0.040054	-0.444837	1.88216
D1 3c	3	c	D1			0.6776	15.4331	2.61974	25.235	3.3446	-0.591454	1.11454	-0.382726	-0.169108	0.5776	0.493126	-0.0461721	0.128835	0.933956	-0.180606	2.03763	-0.306154	1.77947	-0.090302	0.440334	-0.550242	0.151155	0.585415	1.67713	0.117668	0.305074	0.0404342	-0.466669	0.0606826	0.253106	-0.664018	-0.0767141	0.416906	0.257495	0.183092	NA	-0.394159	-0.0104998	-0.372437	0.0687237	0.216103	-0.0279931	0.639807	-0.046988
D1 4c	4	c	D1			0.715	7.43184	1.30862	12.602	1.74061	0.125943	-0.0682176	0.192445	0.0337406	1.03304	-0.39151	0.146716	0.23237	0.337985	0.0360424	0.421068	0.25174	-0.519333	-0.158335	0.26096	0.462454	0.315699	-0.390227	0.117986	-0.485182	-0.159868	0.2886	-0.0411974	-0.887593	-0.453736	-0.54359	-1.42706	NA	1.03403	0.131273	NA	0.665536	-0.0169699	-0.607068	-0.376943	-0.266291	0.128103	0.0127158	1.51033
D1 5c	5	c	D1			0.684	12.725	2.12906	23.3691	2.96665	0.618756	-0.166927	0.609018	0.417888	1.25669	-0.162278	-0.439158	0.363971	0.686915	0.00213567	0.426747	0.708489	0.0282261	0.787955	0.507499	0.309352	0.447765	-0.20812	1.40463	0.161	0.380328	-0.0190688	-0.0387	-1.48588	-0.759782	-0.333467	-0.681331	NA	1.93469	0.475511	NA	-0.112716	0.00446276	-0.44618	0.0531524	0.0679264	-0.0633926	0.0759726	-0.02663
D1 13c	13	c	D1			0.6964	11.0988	1.71008	19.9631	2.45181	-0.997867	-0.69281	-0.233938	-0.20768	0.394341	-0.528584	-0.118359	0.0789646	0.0110443	-0.602622	0.488659	-0.19815	0.351605	1.00841	-0.340789	-0.88383	0.341972	0.284911	0.110372	-0.617442	-0.103737	-0.358275	-0.809155	-0.254536	-0.031125	-0.673799	-0.380002	-0.226818	-1.61029	0.0446132	3.02386	-0.617189	-0.0174523	-0.898141	-0.862945	-0.310762	0.0858749	-0.740185	-0.886474
D1 14c	14	c	D1			0.643	34.5371	5.76276	53.333	7.36498	0.958545	-0.134318	0.531776	0.205856	0.829734	-0.95154	-0.305727	0.116022	0.373412	0.27721	-0.319606	-0.342042	-0.85555	NA	-0.0590893	-0.333682	0.634091	0.29913	-1.25394	-0.406443	0.134403	-0.237112	-0.356741	-0.482831	0.012931	-0.97766	-2.18569	NA	-1.55307	0.185282	0.091318	1.00477	0.0157414	-0.343537	-0.285874	-0.176905	-0.628937	0.0725714	1.75208
D1 15c	15	c	D1			0.6374	17.3486	3.03672	28.8177	3.98126	-0.302679	0.0948612	-0.110775	-0.195701	0.172066	-0.493341	-0.936284	-0.477117	0.0760525	-0.445442	0.443563	-0.228343	0.185151	-0.160542	-0.10524	-1.36893	0.0352896	0.60854	0.234645	-0.629092	-0.0974278	-0.352697	-0.691595	-0.560598	-0.00890204	-0.568066	-2.07175	0	0.954438	0.118508	NA	-0.703269	-0.0127101	-0.371314	-0.445913	-0.041442	-0.388419	0.00754786	-1.10113
D1 16c	16	c	D1			0.6678	13.8848	2.19854	22.215	2.83733	0.611589	0.261154	0.426164	0.036508	0.243281	-0.547787	0.357963	0.168785	NA	0.168596	-1.01222	0.94243	-0.711244	-0.064165	0.210739	-0.00180992	0.0709623	-0.979417	-0.366692	-0.435818	-1.30333	-0.290381	0.357018	-1.59555	-1.39237	-0.181633	-2.20079	NA	-2.74827	-0.120989	NA	0.00563681	0.0439786	-0.563318	-0.205807	-0.493462	-0.0630894	0.211437	-0.921879
D1 17c	17	c	D1			0.6956	24.4065	3.92742	40.8684	5.1167	-0.0515364	-0.13003	0.224872	0.197056	0.927026	-0.503987	1.30346	-0.220798	NA	-0.644239	0.558763	-0.139817	0.971865	NA	-0.158629	NA	0.913878	-0.0622215	-0.450517	-0.412304	0.0392752	-0.313171	-0.383525	-0.328112	-0.117734	-1.58044	-0.83358	NA	NA	0.110399	NA	-0.705518	-0.0198395	-0.896149	-0.545663	-0.180944	-1.27962	0.0514976	-0.0446868
D1 18c	18	c	D1			0.699	18.9496	3.14921	30.6985	4.10469	0.498428	-0.619688	-0.305665	-0.0523652	-0.299539	-1.07262	1.20762	0.466568	-0.41112	0.106395	-1.45804	0.402386	-1.45069	1.35907	-0.0025464	-0.606425	-0.175544	0.607672	-1.30609	-1.08486	-0.282922	0.186905	-0.254757	-0.661195	0.272376	-0.435472	-3.1617	-0.947904	0.395289	0.469704	NA	0.455916	-0.01408	-0.27567	-0.587015	-0.540636	0.00135038	-0.758441	1.18549
D1 19c	19	c	D1			0.696	35.9705	6.34572	56.4092	7.98782	0.975744	0.779308	0.252667	-0.0523665	0.10995	-0.183744	1.07669	0.769476	NA	0.214032	-1.50335	0.229914	-1.57574	-1.07406	-0.662196	0.283461	0.0339854	0.1719	-0.749647	-1.15861	-1.13278	-0.152287	-0.019706	-1.28945	0.372425	-0.249538	-2.78692	-1.06916	1.02297	0.478555	NA	-0.26137	-0.00475232	-0.538099	-0.312134	-0.287383	-1.04807	-0.487282	-0.765172
D1 20c	20	c	D1			0.6762	25.1466	6.16805	43.812	7.56229	0.923539	0.750656	0.38603	0.46548	0.432837	-1.24403	0.708005	-0.0714289	0.231233	0.164092	-0.583552	0.119991	-0.0837522	0.486172	0.298164	0.42077	0.0331404	0.212208	-0.646684	-0.13638	0.141301	0.113947	0.142452	-0.654107	0.152188	-0.533324	-2.30111	0.286624	0.138703	0.0660502	0.442505	0.559055	0.00653747	-0.520704	-0.266708	-0.287989	-0.747919	0.264895	1.08587
D1 22c	22	c	D1			0.6496	20.9252	3.34606	34.1636	4.41811	0.339884	0.28743	0.106501	-0.152346	0.343539	-0.21556	-0.331769	-0.0702682	0.836364	0.137322	2.02587	-0.0631642	1.82384	0.427103	0.210105	-0.191268	0.314928	0.754431	1.23809	-0.0926821	-0.149999	-0.312154	-0.267008	-0.0755679	-0.27832	-1.3272	-0.895316	0.0120651	0.949407	0.563778	NA	0.522597	0.000802864	-0.733348	-0.580117	-0.632602	-0.345251	-0.19946	1.04924
D1 29c	29	c	D1			0.6476	6.78554	1.03447	10.2428	1.33978	0.513381	0.794291	0.0472852	0.0635668	0.324308	-0.0935922	-0.330921	-0.621894	1.7191	0.132426	0.82806	0.852762	1.10815	0.652329	0.718455	-0.769325	-0.803918	-0.37053	0.581724	-0.365357	-0.590132	-0.642709	-0.0800485	-0.572425	-2.13938	-1.90447	-1.03918	-0.917182	0.210717	-0.0481639	NA	-0.383734	-0.0615428	-0.702433	-0.103537	-0.231428	0.448031	-0.143571	-0.933075
D1 30c	30	c	D1			0.697	11.907	1.84827	21.5881	2.50916	1.06817	0.89037	0.232357	0.0126093	0.50767	-0.632846	-0.12421	-0.415736	0.985631	-0.186655	-1.00793	0.609109	-1.88024	-0.345536	0.612573	-0.449503	-0.147975	0.590833	-0.214939	-0.476142	-0.107212	-0.272054	-0.0181032	-0.173164	-1.0919	-0.783872	-2.34341	0.862146	-0.865644	0.818857	NA	0.500119	0.0544632	-0.53017	0.024958	0.0238367	-0.274594	0.118061	0.799201
D1 31c	31	c	D1			0.6966	23.3445	3.44943	36.8734	4.52739	0.828831	1.1594	0.0989291	0.480801	0.569147	-0.445333	0.297323	0.549467	0.149929	0.597146	0.0960846	0.238429	-0.206687	-0.291153	0.210004	-0.221377	0.595631	0.467075	0.339093	-0.587618	-0.212751	-0.0533705	-0.10996	-0.244158	0.444538	-0.57896	-1.47487	NA	0.97438	0.311068	NA	-0.600943	-0.00595764	-0.297041	-0.450705	-0.347949	-0.0746362	-0.035271	-0.932382
D1 50c	50	c	D1			0.6788	10.7139	2.08952	18.5548	2.69562	-0.145753	0.821104	0.219532	-0.407166	0.916086	-0.31916	1.40735	-0.126936	0.585439	-0.292442	1.05843	0.826775	1.60433	NA	0.241504	0.07307	0.367715	0.156477	1.04454	-0.213351	0.240209	0.193523	0.419035	0.370197	0.786839	-0.326863	-1.2295	NA	1.94543	0.378888	NA	0.0784657	-0.00038655	-0.302263	0.0474325	0.211061	0.35321	0.0246583	-0.0375266
D1 51c	51	c	D1			0.6884	16.1975	2.73392	26.8481	3.65749	0.416788	0.812307	0.0914438	0.200555	0.969754	1.05432	0.608413	-0.165799	0.913963	0.395877	1.97782	-0.0117655	1.94552	0.377357	0.708339	0.548699	0.975376	0.591156	2.51882	0.536235	0.0713308	0.419019	0.191541	0.185825	0.687631	0.0673196	0.878449	2.37186	1.07524	1.14764	-1.00783	-0.29423	0.00740279	0.0958534	0.365065	0.246957	0.757962	1.03013	-0.495296
D1 52c	52	c	D1			0.687	28.2044	4.12465	57.4146	6.42533	0.901091	1.05112	0.771208	0.716954	0.630393	-0.433587	-0.735278	-0.135695	NA	0.378434	0.909228	0.433729	-0.220626	0.263524	1.37922	-0.74884	0.521367	0.284976	0.138371	-0.232149	0.256616	-0.243065	0.0144168	-0.222015	-0.159946	-0.905344	-2.81596	0.617754	1.90539	0.237334	NA	0.921963	-0.0250884	0.060901	-0.180019	-0.373191	-0.771904	0.374897	1.47918
D1 53c	53	c	D1			0.6874	12.8439	2.07353	20.511	2.73664	-0.571826	0.291011	-0.182595	-0.914259	0.674183	-0.416305	0.92286	-0.0783434	0.514834	-0.212538	0.696326	0.532266	0.938812	-0.408118	-0.0951604	-0.438011	0.274229	0.131376	0.285994	-0.699124	-0.00324762	0.268479	0.126105	-0.412254	-0.537064	-0.840218	-1.80924	NA	1.39373	0.505382	NA	-0.315877	-0.00253888	-0.421503	-0.253323	-0.241551	-0.130345	0.000941509	-0.62968
D2 1c	1	c	D2			0.684	13.39	2.27	19.44	2.84	0.515728	1.08948	0.686903	0.0899376	0.374	-0.323707	0.300406	0.979946	-0.0596396	0.478036	-0.831953	0.390244	-1.16451	-0.465251	0.473238	0.0296701	0.208307	0.126215	-0.845635	-0.142991	0.28431	0.370289	0.224312	-0.374295	-0.436224	-0.346475	0.400016	0.457265	-0.589071	1.05837	NA	0.921153	0.241961	-0.154706	0.858739	0.318282	0.161872	0.174536	1.61416
D2 2c	2	c	D2			0.695	13.9	2.3	20.05	2.72	0.7351	0.112722	1.08094	0.584024	0.916104	-0.693811	-0.5335	0.291226	-0.10059	-0.949062	-1.12122	0.239039	-0.922164	0.040957	-0.626413	NA	-0.187528	0.0760421	-0.440439	-0.401802	-0.198439	-0.41816	-0.63048	-0.144519	-0.284788	-1.59938	-1.27802	-0.325612	-1.25046	0.36434	NA	-0.211556	-0.0701634	-0.244206	-0.412952	NA	-0.257248	-0.292413	1.88089
D2 3c	3	c	D2			0.678	11.97	1.92	17.52	2.41	-0.599586	-0.087402	0.430868	0.437596	0.287707	-0.247982	0.203117	-0.232987	-0.275027	NA	-0.764157	1.2117	-0.491763	0.290344	-1.33563	NA	0.381223	0.769875	-0.700528	-0.743661	-0.458176	-0.0772101	-0.312633	-0.420159	-0.835703	-1.33755	-0.064106	-0.84913	-1.4832	0.201112	NA	-0.0792932	-0.0786993	-0.542566	-0.465191	1.56156	-0.107383	-1.0145	-0.172795
D2 4c	4	c	D2			0.692	11.34	1.96	16.92	2.44	0.404658	-0.117315	-0.141197	0.0587985	0.463433	-0.573189	0.250731	0.5654	0.734317	-0.132411	-1.10911	0.88691	-1.24021	-1.1956	-0.457231	NA	0.138948	-0.265189	-1.32104	-0.395844	0.0297149	0.0479156	-0.125716	0.165006	-0.882011	-0.902465	-1.47131	0.451411	-2.42601	0.468512	NA	0.641769	-0.0524086	-0.381081	-0.343095	-0.839381	-0.011515	-0.681889	1.03547
D2 5c	5	c	D2			0.66	8.69	1.44	13.77	1.78	0.0090047	0.211152	0.150506	-0.0196834	0.0472766	-1.39279	0.30984	0.78781	0.300131	0.095832	-2.43501	0.539263	-2.70063	0.044222	-0.293972	NA	-0.302404	-0.0515838	-2.39653	-0.395419	-0.0109583	-0.0938897	-0.238113	-0.847458	-0.183255	-0.689958	-0.752781	-0.290498	-1.87542	0.785911	NA	0.0810178	0.0309235	-0.150828	0.0312794	-0.529314	-0.154557	-0.570212	-0.211498
D2 13c	13	c	D2			0.69	13.43	2.16	19.65	2.64	-1.64941	-0.333752	-0.108627	-0.085612	-0.330018	-0.971171	0.118839	-1.02058	-0.807904	-0.940977	-1.00647	0.747	-0.417122	0.542121	-0.443506	NA	-0.276011	0.974605	-1.18257	-0.987977	-0.68848	-0.147468	-0.139446	-0.0583201	-1.56388	-1.09119	-0.575965	-0.382774	-1.33921	0.546483	-1.15184	-0.0371952	0.0576554	-0.636754	-0.296896	1.58009	-0.156949	-0.94998	-0.210545
D2 14c	14	c	D2			0.667	18.53	2.51	26.2	3.2	0.17435	0.0968292	0.555975	0.23204	0.847028	-1.45269	-0.578641	0.573417	-0.312015	-0.66075	-2.10805	-0.482246	-1.74716	-0.249333	-0.200461	NA	-0.181825	0.0559293	-2.08917	-0.631034	-0.176257	-0.437078	-0.73215	-0.688033	-1.13028	-1.66899	-1.17511	-0.291649	-1.46897	0.657844	-1.57537	0.294897	-0.194739	-0.620522	-0.344077	-0.588286	-0.481856	-0.443701	1.35485
D2 15c	15	c	D2			0.665	13.22	2.24	16.71	2.91	-0.675324	-0.210107	-0.543253	-0.092506	0.124068	-0.779508	-0.371096	0.174927	-0.591915	-0.882862	-1.72656	0.346219	-1.2864	-0.503734	-1.02397	NA	-0.0587695	0.502956	-2.27205	-0.839769	-0.323571	-0.342364	-0.54826	-0.225056	-1.66662	-1.46936	-0.702217	-0.841849	-1.85786	0.414674	-1.30478	-0.541375	-0.181658	-0.529474	-0.284085	0.789224	-0.022919	-0.372954	-0.77535
D2 16c	16	c	D2			0.682	4.51	0.69	6.02	0.78	-0.370698	0.35238	0.0248109	0.864646	1.46811	-0.792656	-0.194381	-0.889461	-0.213865	NA	-1.91599	0.775691	-1.05547	-0.173299	-1.3775	NA	-0.2375	-0.814446	-1.94441	-0.452547	0.069982	-0.365248	-1.04481	0.223813	-1.53905	-1.17683	-1.80775	-1.27842	-1.04342	-0.948048	NA	-2.34049	-0.241959	-0.646707	-0.0111845	NA	0.12123	-0.157659	0.0606089
D2 17c	17	c	D2			0.671	21.4	3.4	30.06	4.05	-0.379663	-0.0863631	-0.0319404	0.0374114	0.408422	-1.74058	1.23132	0.255529	-0.0663805	-0.860589	-2.53909	-0.0208986	-1.68677	-1.26208	-0.605311	NA	-0.209936	0.116815	-2.33977	-0.871105	-0.202503	-0.220389	-0.149154	-0.0341144	1.20589	-1.54259	-1.7742	-0.425299	-0.730229	0.624858	0.444173	-0.670447	-0.180075	-0.97283	-0.360408	0.197492	0.257609	-0.795634	0.0916032
D2 18c	18	c	D2			0.667	7.15	1.12	9.83	1.28	-0.714624	0.274367	-0.272464	0.335118	0.656689	-0.911923	-0.774159	0.474937	0.362684	-0.24576	-1.27103	0.453549	-0.480906	0.264537	-0.77484	NA	0.398099	0.590007	-0.076272	-0.442382	-0.202752	-0.615842	-0.494397	-0.406718	0.51365	-0.727961	-0.621591	0.420494	-1.14767	0.538613	-0.49554	0.561298	-0.44934	0.414931	0.215746	0.262186	-0.0378907	-0.546221	1.80945
D2 19c	19	c	D2			0.679	18.97	3.12	25.3	3.65	0.0568609	0.722071	-0.144576	-0.22773	0.378358	-0.271309	0.632707	0.477252	0.548218	-0.569503	-1.03003	0.0939264	-0.891169	-0.55712	0.565	-0.211724	0.0555235	0.0797362	-1.2342	-0.216889	0.0652125	-0.526387	-0.562916	0.154328	0.130707	-0.561309	-0.892886	-0.447849	-0.962823	1.13077	-0.644215	-0.182666	-0.237791	-0.365731	-0.318135	0	0.156581	-0.437906	-0.378651
D2 20c	20	c	D2			0.682	10	1.68	14.61	2.05	-0.230443	0.467188	0.49965	0.732275	0.888725	-1.14378	0.0579742	-0.0756759	0.612567	-0.438006	-1.2149	0.432019	-1.21528	1.02368	0.127553	0	-0.0198084	-0.504551	-0.483988	-0.621259	-0.493783	-0.0976933	-0.258094	-0.670478	0.528522	-0.879659	-0.457665	-0.0163072	-0.406744	-0.136865	-0.452625	0.896469	-0.0814183	-0.535111	-0.231306	-0.086926	0.331843	0.213128	1.43927
D2 22c	22	c	D2			0.671	20.11	3.09	29.63	3.88	0.411455	0.756989	0.873858	0.454713	1.20597	0.147695	0.337599	0.324133	0.83354	0.293568	-0.437089	0.841863	-0.429464	0.247265	-0.0457952	NA	0.593228	0.687097	-0.301318	-0.147235	0.0902754	0.045502	-0.0941379	-0.473784	-0.407181	-0.806045	-0.629437	-0.0434464	-0.319172	0.347168	-0.348203	0.0984033	-0.159369	-0.79019	-0.0944117	-0.465284	0.144958	-0.128248	1.3972
D2 29c	29	c	D2			0.706	5.67	0.97	9.13	1.23	-0.576252	0.48168	-0.0347802	0.438187	1.08567	-0.899357	-1.6497	-1.63778	0.0866435	NA	-0.815048	0.215039	-0.509523	0.0915433	-1.20466	NA	-0.926069	-0.329033	-0.380724	-0.971063	-1.27758	-1.17024	-0.924292	-0.396367	-0.923979	-2.9057	-1.34648	-0.215178	-1.63427	-0.376548	NA	NA	-0.101189	-0.538096	-0.0178346	NA	0.189002	0.107095	-0.705169
D2 30c	30	c	D2			0.684	15.13	2.28	22.23	2.8	-0.0516151	0.794309	0.561714	-0.0227079	0.422017	-0.876821	0.449745	0.172309	0.436902	-0.613669	-1.9749	0.445074	-3.08585	-2.03697	-0.469728	NA	-0.0976591	0.294127	-2.51507	-0.972673	-0.0179202	0.0727507	-0.176924	0.316002	-0.590842	-0.517024	-3.00886	-0.19292	-1.25151	0.699399	NA	-0.231926	0.0680675	-0.761738	0.0371974	0.0130621	0.146055	-0.0577677	0.859008
D2 31c	31	c	D2			0.678	22.47	2.8	30.26	3.26	-0.203732	-0.0123143	0.241188	0.017609	0.130342	-0.471431	0.568832	-0.291684	0.767381	0.653253	-0.485653	1.36737	-0.335725	0.0949584	-0.298226	NA	0.227392	-0.0218691	-0.707139	-0.887209	-0.41108	-0.101343	0.188081	-0.324043	-1.99887	-1.32522	-0.847656	-0.895875	-0.919728	-0.209487	NA	-0.136611	0.0606673	-0.573861	-0.0481407	0.415636	-0.0279801	-0.387624	-0.382415
D2 50c	50	c	D2			0.679	6.72	1.24	10.15	1.49	0.0909927	0.0409585	0.393597	0.0508356	-0.0753834	-0.580218	-0.252853	-0.931952	0.652668	0.301416	-0.249324	0.0549211	0.183846	-0.447616	-0.241399	NA	-0.0202178	0.526379	-0.22387	-0.306687	0.367829	-0.295968	-0.256026	0.267766	0.724091	-1.08074	-0.673454	0.875558	-1.40573	0.903883	NA	-0.156417	0.0683114	0.0872914	0.330096	-0.557267	0.152774	0.269311	-0.524913
D2 51c	51	c	D2			0.657	10.41	1.67	14.21	1.99	0.344408	0.785398	0.783845	0.199871	0.26648	-0.598841	0.135126	-0.427593	-0.150482	0.131899	-0.0911156	0.853827	-0.0426253	0.240971	-0.0134551	NA	0.352528	1.07032	-0.915926	-0.557073	0.150837	-0.0960482	0.344569	0.0591425	-0.164061	-1.061	-1.50477	1.03004	-0.107981	1.29508	NA	0.0130816	0.0888287	-0.104053	0.622926	0.299881	0.184813	0.659556	-0.647495
D2 52c	52	c	D2			0.677	18.23	3.05	29.24	3.91	0.379993	-0.104334	0.295862	0.00524158	0.216471	-0.219203	-0.372167	0.471852	0.550671	-0.390231	-0.390842	0.636893	-0.752905	-0.447481	0.353558	NA	0.157297	0.421791	0.0488304	-0.221204	0.201783	-0.168419	-0.00245004	-0.166291	-1.17187	-1.42674	-0.297822	-0.238319	-0.729411	0.925262	-0.125469	0.555983	0.112616	-0.393536	0.403655	NA	-0.322799	-0.00907326	0.644121
D2 53c	53	c	D2			0.67	6.79	1.11	9.47	1.32	-0.0624009	0.794119	0.719828	0.570451	0.51871	-0.308779	-0.610936	-1.21793	0.769129	0.255515	-0.864941	1.144	-0.683302	0.73855	-1.44903	NA	0.26865	-0.0123369	-0.167816	-0.78466	-0.224102	-0.575435	-0.288126	-0.146137	-0.29582	-1.54188	-0.49664	0.0206397	-1.63571	-0.194362	NA	0.570631	-0.0683283	-0.490987	-0.523687	1.24951	0.564033	0.33163	0.125098
D1 14d	14	d	D1	60.2	0.0875821	0.679	3.71914	0.966861	5.33634	1.23649	0.449556	-0.900329	0.0190601	-0.425139	-0.549249	0.187514	-0.372549	0.592261	-0.771113	0.864078	-2.53291	-0.358076	-1.71468	-0.701453	-0.994443	0.697997	-0.00526427	-0.0803553	-1.05282	-0.191006	-0.25159	0.0816034	-0.152019	-0.237289	-0.694516	0.843114	-0.747738	-0.0677236	-0.327219	-0.34796	-0.573403	0.508209	-0.0264883	0.119671	-0.139172	-0.177283	-0.216471	0.0210004	1.45181
D1 31d	31	d	D1	9.4	0.0813262	0.637	3.77914	0.925434	5.47842	1.19109	-0.15229	-0.899135	-1.35279	-0.985854	-0.430808	0.93559	-0.559338	0.0105339	-0.625995	0.392155	0.290527	-1.33711	0.580537	-0.0102443	-0.667277	0.559926	-0.915772	-0.973369	0.387954	1.05674	-0.519192	0.115306	-0.229148	0.569467	0.263	1.10548	0.69881	-0.10681	0.411638	-1.07684	-0.481333	-1.43002	-0.14594	0.263084	-0.133172	-0.332164	0.60817	0.672724	-1.46249
D1 52d	52	d	D1	36.5	0.07663	0.69925	3.36547	0.867104	5.2884	1.18605	-1.88765	0.381794	-0.927076	-1.06592	-0.25155	-0.534588	-1.3939	0.195123	-0.225104	-0.487503	-0.276505	-0.11299	-0.7613	-0.882707	-0.935011	-1.21773	-0.030265	1.03923	0.591269	-0.225486	-0.605328	-0.0353711	-0.0445728	0.159592	-0.245589	1.05407	0.372433	0.49185	-0.488794	-0.0278547	-0.540513	0.164202	0.0326512	1.50242	0.509004	0.541808	-0.122855	0.220289	1.08078
D1 1d	1	d	D1	17.8	0.0752	0.7012	2.94218	0.830917	4.38158	1.09028	-1.19113	-1.10774	-0.520085	-0.816751	-0.0759368	-0.00733007	-1.12814	-0.31947	0.200995	-0.334349	-0.0515982	-0.713002	-0.42014	-0.421822	-1.48925	-0.29309	0.0410805	-0.169358	-0.0638484	-0.22064	0.0291919	0.340361	-0.173151	0.21641	0.584649	1.58552	-0.192058	0.277653	-0.942403	-0.488625	-0.262897	0.0699555	0.00619221	1.49811	0.285465	0.368887	-0.151956	-0.0719416	1.2319
D1 3d	3	d	D1	43.4	0.0725654	0.6442	3.34374	0.846189	5.1862	1.10615	0.359682	-0.485663	0.211001	0.199905	0.0275162	1.26947	-0.319068	-0.347238	0.314954	-0.324206	0.45649	-0.731321	1.95729	0.740501	0.07115	0.552288	0.383649	-0.288619	0.494985	1.12201	0.336305	0.0488598	-0.201138	0.748347	-1.51778	0.909322	1.12912	-0.32067	-1.3558	-0.903471	0.629294	-0.224145	0.0349859	0.612025	0.0329771	0.079123	-0.154874	-0.121848	0.247136
D1 22d	22	d	D1	51.8	0.0693648	0.6162	3.60082	0.820302	5.1292	1.07655	-0.615392	-0.281248	-0.705153	-0.344254	-1.14397	0.282449	-0.0193975	-0.392594	-0.0682973	0.0266961	0.246893	-0.662778	0.658447	0.0219513	-1.09613	-0.059143	-0.672066	-0.664616	0.388571	0.475138	-0.543796	-0.152921	0.109819	0.295012	0.910659	1.12155	0.189821	-0.0733	-1.54258	-0.665694	-0.424843	-0.146227	-0.120281	0.562904	0.261612	0.51894	0.39419	0.166782	0.665537
D1 20d	20	d	D1	17.8	0.0655879	0.678	2.89562	0.730356	4.17852	0.9685	-0.524751	0.231427	-0.901132	-0.4662	-0.90348	0.366514	-0.160997	0.00696293	-1.00689	-0.440333	0.895475	-0.6226	0.881878	-0.676949	-0.184809	-0.38163	-0.814897	-0.45184	0.246582	0.338024	-0.483177	-0.336211	-0.281353	0.237681	0.885909	1.37342	0.836447	0.20717	-1.00601	-0.553042	-0.411079	-0.0144984	-0.20257	1.0564	0.144018	0.0711678	0.0489373	0.826256	0.771724
D1 15d	15	d	D1	17.8	0.0651341	0.6736	2.85462	0.759132	4.28386	0.991221	0.134239	-0.948438	-0.121143	-0.158962	0.14428	0.981246	-0.257996	1.20164	-0.208722	-0.275452	0.0922443	-0.213466	0.334756	-0.125742	-0.384924	0.761673	0.109612	-0.383068	-0.729595	0.780869	0.538591	0.328213	0.214027	0.430601	-1.12186	1.12432	-0.648229	-0.455103	-1.82671	-0.222722	0.873039	-0.707126	0.0644243	0.655425	0.155984	0.701083	0.0988493	-0.0162274	-1.19291
D1 17d	17	d	D1	51.6	0.0646581	0.5832	3.04576	0.757612	4.9142	1.00804	0.766556	-0.00218342	-0.43126	0.026821	-0.0144473	2.38238	0.801203	-0.00120487	0.00852734	0.100753	0.409375	-0.746195	0.672782	-0.00578957	0.251027	0.654668	0.16104	-0.744352	-0.141155	1.60227	0.260175	0.149278	-0.133778	0.333972	2.09295	1.6157	1.812	-0.23019	0.439242	-0.772723	0.0707117	-0.298958	-0.0974534	0.819906	-0.118	-0.465407	0.541377	0.885395	-0.363023
D1 13d	13	d	D1	34.8	0.0645237	0.6882	2.94264	0.752989	4.56748	0.988402	0.0689515	-0.938845	-0.677355	-0.280621	-0.821563	1.51121	-0.778287	-0.701526	-1.4002	-0.169873	-0.390525	-1.14229	-0.865499	-1.05361	-0.303216	0.669279	-0.917736	-0.609429	-1.23202	1.29858	0.295319	0.151612	-0.320381	0.485892	-0.0668787	0.894451	0.377345	-0.529572	1.00953	-1.13638	-0.113667	-1.20092	-0.0681556	0.0919311	-0.520528	-0.633171	-0.260747	0.257518	-1.40134
D1 30d	30	d	D1	51.6	0.0644709	0.6948	2.7907	0.692518	4.2544	0.925589	-0.003134	-0.0255365	-0.64224	-0.241975	-0.545171	0.201002	-0.660345	-0.207081	-1.37935	-0.907643	0.231206	-0.510888	-0.356244	0.229168	-1.07367	-0.638893	-0.286316	-0.623717	-0.692743	-0.486234	-0.325602	0.116871	-0.284387	0.0590517	-0.773783	0.145833	-2.12436	-0.127254	-2.0084	-1.14674	-2.06922	-0.364884	-0.0465479	0.0761789	-0.318336	-0.0269694	-0.116731	-0.257472	-0.134308
D1 18d	18	d	D1	9.4	0.0636288	0.7074	2.62026	0.911161	3.9624	1.14334	0.199577	0.497681	-0.102876	-0.161818	-0.225314	-0.689738	-0.046733	1.10978	-0.405382	-0.016154	-1.61471	-0.219406	-1.93132	-0.71721	-0.888501	-0.996312	-0.554789	0.699043	-1.25337	-0.843543	0.115032	0.245764	-0.0990263	0.270931	0.130277	1.48196	-2.07234	-0.416634	-1.23548	-0.1528	-0.371135	0.544074	-0.0171202	1.24022	0.107743	0.645652	-0.233627	-0.185459	1.28926
D1 51d	51	d	D1	26.2	0.0634175	0.6532	2.56156	0.693365	4.08202	0.939756	-0.500961	-0.560686	-0.476409	-0.0626585	0.169251	1.36984	0.761002	0.658386	0.189399	0.332132	0.887621	0.0385662	1.47858	0.718142	-0.176506	1.21242	0.360978	-0.0806619	1.79116	1.35943	-0.477053	0.796972	0.447179	0.46924	-0.293367	1.19021	1.22922	0.647425	0.559038	-0.829542	-0.00399445	-0.738807	0.0787632	0.697707	0.287522	0.62866	0.451631	-0.235692	-1.00837
D1 19d	19	d	D1	26.4	0.0630989	0.6336	3.0782	0.796643	4.21608	0.966702	-0.932499	0.426983	-0.927005	-0.695226	-1.4365	1.17281	-0.59996	0.0679579	-0.903954	-0.239213	-0.202086	-0.942814	-0.408414	-1.03836	-1.54039	0.397538	-0.846476	-1.18879	-0.0787603	-0.37277	-0.91123	-0.596182	-0.570069	0.139064	1.26744	1.23318	-0.444912	-0.214387	-1.21019	-0.553816	-0.597463	-1.07009	-0.050943	0.752883	0.232114	0.298985	0.300171	0.42604	-1.25016
D2 14d	14	d	D2	12.2	0.0629291	0.6	3.68	0.86	4.53	0.98	-0.300834	-1.05912	-0.430058	-0.506544	-0.309487	0.46728	0.683153	0.900726	0.122618	0.348815	-0.05519	-0.732665	0.879519	0.0922229	0.344572	0.0115043	-0.132272	1.32434	0.615104	1.01008	0.0817764	-0.0333516	0.379033	-0.629887	1.24484	1.73048	0.848123	-0.0348141	0.777946	0.507281	-0.288475	0.503466	-0.200794	1.10864	0.778984	0.136209	0.631456	0.527515	1.64102
D2 3d	3	d	D2	45.6	0.0618367	0.54	2.95	0.75	3.82	0.87	-0.519638	-0.675277	-0.735991	-0.581981	-0.64159	0.103273	0.231197	0.238151	-0.2781	0.863529	-1.20474	-1.08097	-0.925751	-0.321041	-0.340297	-0.908997	-0.323088	-0.3716	-0.786534	0.162962	-0.524789	-0.223144	-0.331031	-0.326822	0.390881	1.42298	-0.232148	0.206984	0.217166	-0.457132	-0.878977	-0.106225	-0.0658254	0.585129	-0.160248	-0.782843	0.0882172	0.81103	0.954819
D2 15d	15	d	D2	19.8	0.060411	0.571	2.86	0.72	3.54	0.83	0.482907	-0.641778	-0.513602	-0.28054	-0.554449	1.07883	0.276138	-0.280273	-0.40608	0.303717	-0.88414	-0.28357	-0.457451	-0.617194	-0.1743	-0.158181	-0.36325	-1.16979	-1.31148	1.08446	-0.270558	-0.696711	-0.132552	-0.925866	0.202066	0.804822	-0.892865	-0.581724	3.00119	-1.00551	0.180591	-1.38419	-0.124675	0.139777	-0.361749	-0.58651	-0.286396	0.532866	-1.06536
D1 50d	50	d	D1	51.8	0.0603733	0.6794	1.8379	0.498502	3.45052	0.726184	0.716932	-0.937567	0.131215	0.459208	-0.17479	1.94519	0.917031	0.0881929	0.437708	0.674973	2.43278	0.127296	2.29711	0.919976	0.704026	1.90045	0.90097	-0.265178	1.97259	1.71371	0.251201	0.92763	0.809014	0.623589	-0.53174	0.499393	1.89862	0.785435	1.24773	-0.607839	-0.0483527	-0.475039	0.0806407	0.330104	0.240638	0.361707	0.957604	-0.133159	-0.778902
D1 53d	53	d	D1	17.8	0.0603201	0.6972	2.56516	0.664099	3.79806	0.880421	-0.849392	-0.650087	-0.474696	0.00570935	-0.0342237	0.875635	0.20579	-0.179595	0.345963	0.462468	1.65628	-0.266105	2.1287	0.780223	0.125317	1.11189	0.45919	-0.28741	1.91674	1.4306	-0.50723	0.862878	0.475987	1.34216	0.0900682	1.35442	1.88292	0.794335	0.93097	-0.959805	0.917835	-0.422747	0.0239356	1.1756	0.13821	0.141134	0.913154	0.480672	-0.355466
D1 16d	16	d	D1	54	0.0599856	0.69525	2.409	0.616285	3.40243	0.783457	0.177295	0.0298082	-0.0483386	0.365642	-0.207546	1.23696	-1.20383	0.264662	-0.476677	-0.113925	1.80031	-0.073329	1.81482	0.265874	-0.484562	1.33327	0.54247	-0.564774	1.01896	0.727497	0.135815	0.161719	0.0443442	-0.556577	-0.715878	0.911391	0.347034	0.0535323	-1.12256	-0.536011	1.10442	-0.36047	-0.0148685	0.612617	0.461324	0.389487	-0.0974665	0.684162	-0.849321
D1 2d	2	d	D1	26.2	0.0585634	0.6978	3.01774	0.633312	4.58342	0.87677	-1.60036	-1.73198	-0.866572	-0.851854	-0.773047	-0.0402717	0.170386	0.118366	-0.774555	-0.119363	-0.845944	-0.336071	-1.74687	-0.552927	-1.2745	-0.28423	-0.370371	0.236922	-1.28506	-0.192388	-0.182507	0.166821	-0.219705	0.176982	0.252421	0.718366	-0.135352	0.16436	-1.52676	-0.641688	-0.0358821	0.166278	-0.0490665	0.960803	0.0172061	0.160388	-0.176951	-0.739839	1.5368
D2 13d	13	d	D2	37.4	0.0581953	0.575	2.39	0.59	3.16	0.83	0.0289914	-0.489016	-0.608012	-0.119508	-0.236171	1.70211	1.04898	-0.157388	0.503585	-0.52357	1.51627	-1.17307	0.892481	0.379858	0.227172	0.242357	0.270752	0.251729	0.726689	1.44553	-0.404475	-0.150005	0.125689	-0.821292	1.97281	0.542455	1.1467	0.622768	3.50682	-1.05089	2.38349	0.996468	-0.277789	-0.0301867	-0.432207	NA	0.304828	1.69019	-0.520761
D1 4d	4	d	D1	9.4	0.0527147	0.5994	1.99882	0.560392	2.86828	0.739259	-1.32709	-0.397635	-0.274118	-0.217934	-0.550738	-0.270922	-0.510548	-1.24302	-0.70399	-0.484445	-0.772634	-0.538683	-1.56979	-0.460345	-0.906575	-0.31871	0.0246709	-0.657089	-1.03213	0.523201	-0.0776874	0.0623041	0.192542	0.136284	1.05704	1.49252	0.537869	-0.211056	-1.82697	-1.68526	0.351011	-0.00145055	0.134892	1.3325	0.15629	-0.416994	0.0771562	0.552278	0.934424
D1 5d	5	d	D1	43.2	0.0525656	0.6718	2.11458	0.519075	3.36126	0.734677	-0.267548	-0.00859362	-0.308096	-0.00339784	-0.818644	-0.148099	-1.2237	0.12698	-0.684482	-0.530047	-1.30522	0.0683469	-1.44563	-0.302476	0.224968	-1.3452	-0.469633	0.0642678	-1.58797	0.702647	0.949908	0.571732	0.46347	0.431562	0.883712	0.786341	-1.28051	-0.168507	-0.827258	-0.53138	-0.0932066	-0.73331	0.0125669	1.26754	0.438209	0.681122	-0.330347	0.423508	-0.775802
D2 22d	22	d	D2	35.5	0.0523867	0.539	2.78	0.67	3.17	0.72	0.69427	-0.318073	0.391995	-0.0852289	-1.1816	-0.279819	0.098181	-0.596342	-0.635132	-0.109495	-2.32016	-0.74629	-1.1049	-1.48998	-0.0324967	-0.230821	-0.383581	-0.311205	-2.38526	0.186885	0.335077	-0.19694	-0.165692	-0.188871	0.345723	0.982486	-0.527108	-0.774381	0.177011	-0.473635	-0.108512	-0.720502	0.0455665	0.477753	0.187872	-0.490162	-0.0460788	0.338089	0.311885
D2 52d	52	d	D2	11.6	0.0517815	0.516	2.36	0.63	2.9	0.72	-0.735938	-1.60659	-0.515081	-0.807621	-1.22275	0.801659	-0.579295	-0.202995	-0.16721	0.184351	-0.110455	-0.629115	-0.129436	-0.922292	0.398268	-0.276448	-1.10536	0.0545398	-0.487489	0.554188	0.227038	0.00853787	0.225532	-0.0121807	0.975091	1.54556	0.491176	0.371673	0.819099	-0.104719	0.589572	0.366086	0.0607759	1.20869	0.471818	-0.32973	0.468602	0.941622	0.987659
D1 29d	29	d	D1	47	0.0495381	0.712333	1.9147	0.48845	2.99107	0.691575	1.09453	0.823741	-0.0923156	0.617051	0.184261	1.03096	-0.322491	-0.110263	0.490343	-0.0673998	1.30714	0.480888	1.62797	0.496393	0.985605	0.445362	-0.165905	-0.68763	1.78663	1.30291	0.433214	0.154048	0.598146	-0.231487	-0.207642	0.311913	1.58279	-0.255517	1.57606	0.0863298	0.0493854	-0.0229854	0.0808431	1.03871	0.908696	1.1255	0.453509	0.733316	-0.968883
D2 31d	31	d	D2	20.4	0.047687	0.59	2.77	0.62	3.46	0.72	-0.634956	-1.50308	-0.671436	-0.731019	-1.59838	0.267222	-1.05625	-0.815982	-0.919577	0.268921	-0.802437	-0.653503	-0.734393	-0.49245	-1.15497	-0.0320469	-1.01317	0.35618	-1.04927	0.321602	0.0392799	-0.12789	0.300409	0.856129	1.20278	1.54528	-0.110181	0.121026	-0.342515	-0.301263	-0.665254	-0.779336	-0.089673	0.957549	-0.502805	-0.198303	0.0478649	0.0770853	-1.06499
D2 19d	19	d	D2	4	0.0465621	0.561	2.75	0.64	3.3	0.71	0.285789	-0.365772	-0.342346	-0.0878424	0.191093	0.483919	-0.518105	-0.101753	0.02485	0.198071	0.583916	-0.332498	0.697545	0.0219226	0.497343	-0.135731	0.191005	-0.452689	0.719772	0.966428	0.193167	0.236135	0.377876	0.586656	0.214819	0.0749274	0.773365	0.054124	1.78223	-0.43729	-0.0451872	-1.66729	-0.129009	0.55318	0.415674	-0.41794	0.477325	0.577371	-1.14414
D2 17d	17	d	D2	53.8	0.0443143	0.551	2.76	0.57	3.59	0.67	0.365532	-0.383628	-0.179229	-0.0109973	-0.329002	0.473735	1.19472	0.339681	0.115163	0.642921	-0.951824	-0.614224	0.537352	-0.312094	0.236247	0.264052	-0.134195	-0.179726	-0.604248	1.62669	0.663173	0.57839	0.649748	1.16745	1.15667	1.28747	-0.0298939	0.212269	2.08045	-0.675073	0.636554	0.162802	0.0823856	0.450057	0.270218	-0.520871	0.325113	0.7427	1.51686
D2 2d	2	d	D2	36.8	0.0431056	0.455	2.2	0.54	2.76	0.59	-0.0796237	-2.4507	-0.473018	-0.113359	-0.593163	0.363512	-0.0729386	-0.339604	-0.614031	-0.474873	-0.296526	-0.837413	-0.143858	-1.03167	-0.538825	0.0174295	-0.0444236	-0.288004	-0.930897	1.07043	0.452227	0.484792	0.220059	0.498811	0.267968	0.920646	0.319037	0.039604	1.52645	-0.562745	0.0750107	-1.85183	0.0364733	0.297852	-0.40918	-0.750022	-0.077712	-0.751298	-1.14061
D2 20d	20	d	D2	28.6	0.0419657	0.481	2.05	0.51	2.5	0.56	0.237476	-1.34073	0.227505	0.235221	0.379215	2.32144	0.184364	0.325234	-0.201985	-0.145945	1.18111	-0.6065	1.0418	0.070068	0.129173	0.77704	0.507274	0.294616	1.15847	1.62315	0.179669	0.476188	0.282511	-0.0631733	0.0880607	0.933263	1.23364	0.540633	3.88156	-0.288545	1.37385	-0.445186	0.0161901	0.310779	-0.210643	0.352993	0.0798573	-0.260868	-0.357058
D2 1d	1	d	D2	20.4	0.0402678	0.549	1.8	0.49	2.06	0.53	-0.421279	-1.14597	0.0737929	-0.0822326	-0.89342	1.65192	0.0257636	-0.196355	0.0202524	0.0965719	0.887253	-0.609979	0.506908	0.260757	0.331657	-0.274961	-0.287595	0.0371412	0.427759	1.17043	0.378609	0.590644	0.570302	-0.0543447	0.125677	1.60725	0.887408	0.73647	3.3195	-0.253992	0.756487	0.65144	0.361998	0.493815	0.120425	-0.155751	0.288605	0.359234	1.24647
D2 50d	50	d	D2	80.2	0.0397294	0.444	1.13	0.4	1.46	0.45	0.465457	-0.979535	-0.0847726	-0.0959316	-0.637763	1.84894	0.252665	-0.47542	0.311306	0.433393	1.20692	-0.709082	1.51633	0.829561	0.980321	0.460942	-0.159944	0.171497	1.07532	1.51228	-0.114137	0.273566	0.643178	0.51126	-0.55113	0.290017	0.78205	0.927993	4.3194	-1.07332	2.10701	0.815922	0.0199496	-0.428566	-0.0845373	0.0837385	-0.137725	0.983164	-1.28114
D2 5d	5	d	D2	28.6	0.0396058	0.554	1.81	0.47	2.27	0.53	0.279419	-0.491485	-1.17126	-0.352665	-0.833846	1.70432	-0.84669	-0.15529	-1.32695	-0.870791	1.15406	-1.33655	0.511031	-1.27486	-0.74521	-0.941695	-0.257742	-0.866011	-0.193415	0.971889	-0.250998	-0.15343	-0.666742	-0.36303	0.353367	0.931954	0.462845	-0.804375	-0.326025	-0.989877	-1.09925	-1.73909	-0.372648	0.463358	-0.276752	-0.76448	-0.0430924	0.882797	-1.3238
D2 30d	30	d	D2	12.2	0.0395332	0.495	2.29	0.52	2.74	0.57	0.204713	-0.635717	-0.898566	-0.360665	-0.614798	-0.577674	0.0283773	-0.506011	-0.646559	0.650342	-1.41069	-0.601761	-1.21169	-0.993169	0.142528	-0.405125	-0.0438535	0.223882	-1.0467	1.0277	0.451229	0.374454	0.428171	1.15032	0.609737	0.951085	0.0534654	-0.133642	1.33138	-0.251178	-0.226485	-0.0374594	0.00317866	0.163267	-0.043917	0.303163	0.0394756	0.191212	1.18724
D2 18d	18	d	D2	4	0.0349443	0.535	1.52	0.38	1.74	0.46	-0.114527	-0.556588	-0.564519	-0.242232	0.111472	0.746841	0.535528	0.271557	0.0176948	-0.69766	0.0703971	-0.640102	-0.19964	-0.0186692	-0.258729	NA	0.296485	-1.12351	-0.144914	0.973728	-0.108273	0.0626646	0.0925078	-0.906815	-0.0904782	0.339274	0.462126	0.534829	1.66322	-0.242304	-0.517281	-0.231159	-0.253181	0.080299	-0.266958	NA	0.174661	-0.400147	1.52374
D2 16d	16	d	D2	45	0.0330468	0.568	1.59	0.4	1.89	0.43	0.273633	-0.600928	-0.192368	-0.221096	-1.04548	1.05566	0.223979	0.250301	-0.363752	-0.669788	0.298355	-0.712113	-0.29255	-0.56826	0.075591	-0.545456	-0.314116	-0.635787	-0.401571	1.37541	0.274043	0.137142	0.323792	-0.237557	0.907073	0.714192	0.941687	0.158196	2.20937	-0.563085	0.240679	0.107316	-0.10103	0.434607	0.0319666	-1.13741	0.128756	0.212976	1.19141
D2 29d	29	d	D2	19.8	0.0326415	0.611	1.64	0.39	2	0.45	-0.170372	-0.485541	-0.225212	-0.41684	-0.986586	0.563349	0.188567	0.440502	0.0738329	0.369181	0.526004	-0.36289	0.724732	-0.132737	0.94473	0.596178	-0.156287	0.0357101	0.401886	0.4732	0.0691195	0.395215	0.366719	-0.131013	-0.464563	0.924357	0.356132	-0.0825996	1.61361	-0.363789	0.0745549	-0.419591	0.0869572	0.22421	0.260771	-0.21349	0.110964	0.341408	-1.40476
D2 53d	53	d	D2	56	0.0315412	0.497	1.49	0.34	1.9	0.39	0.583851	-0.783318	0.271487	0.33144	-0.675555	1.09979	0.69049	-0.0501511	0.444289	0.430761	0.811393	0.235323	1.23773	1.36072	1.48465	0.837839	0.310968	-0.729762	0.77345	1.7373	0.127483	1.12849	1.24435	0.16296	-1.74844	0.435698	0.844729	1.58296	4.17626	-0.795461	1.52856	-0.455271	0.164056	-0.273006	-0.38829	0.82868	0.224543	0.588695	-1.00701
D2 4d	4	d	D2	36.8	0.0310578	0.503	1.56	0.41	1.82	0.45	-0.52298	-1.40352	-0.973782	0.0894994	-0.0163435	1.96942	-0.579711	-0.167554	-0.146545	-0.0389984	1.39326	-0.624772	1.00164	-0.510268	0.299987	NA	0.228831	-0.299907	0.436463	1.73852	-0.0395004	0.562349	-0.175704	0.75005	-1.01271	1.53252	1.06526	NA	2.42297	-0.890016	0.79336	0.199225	-0.0691029	0.756707	-0.358924	0.449944	-0.0345142	0.112925	-0.71993
D2 51d	51	d	D2	82.6	0.0273275	0.331	0.95	0.29	1.26	0.33	0.495005	0.441449	0.135091	0.167007	-0.138772	1.84004	-0.504833	-0.466724	0.576913	0.817909	1.45758	-0.654655	1.8111	0.967868	0.57898	0.544851	-0.548015	0.405032	1.3324	2.30706	0.124349	0.730923	0.69345	1.39983	-0.116682	0.458785	0.783998	2.04286	5.00324	-0.573777	2.17338	0.507466	0.0880003	-0.204285	-0.576718	0.64476	-0.0937996	2.0961	-1.11374
[truncated: 40 more columns]
